# Supplementary material for: Development of silicon-fluorescein-based photolabile protecting groups with enhanced uncaging quantum yield
Source: Royal Society of Chemistry journal article supplement (doi:10.1039/d5ra09470d), 2026-03-02
Supplement: d5ra09470d1.pdf [file d5ra09470d1.pdf]

1 **Supporting Information**

2  
3  
4

5 **Development of silicon-fluorescein-based photolabile protecting groups**  
6 **with enhanced uncaging quantum yield**

7  
8  
9

10 Naoya Ieda,<sup>a,b\*</sup> Miyu Tachi,<sup>b</sup> Misuzu Noda,<sup>c</sup> Mei Harada,<sup>a</sup> Yuji Hotta,<sup>c</sup> Kazuki Kondo,<sup>d</sup> Haruka  
11 Tsuchiya,<sup>a</sup> Mikako Ogawa,<sup>a,e</sup> Mitsuyasu Kawaguchi,<sup>b</sup> and Hidehiko Nakagawa.<sup>b\*</sup>

12

13 *<sup>a</sup>Graduate School of Pharmaceutical Sciences, Hokkaido University; N12 W6, Kita-ku Sapporo,*  
14 *Hokkaido, 060-0812, Japan: <sup>b</sup>Graduate School of Pharmaceutical Sciences, Nagoya City University;*  
15 *3-1, Tanabe-dori, Mizuho-ku, Nagoya, Aichi, 467-8603, Japan: <sup>c</sup>Graduate School of Medical Sciences,*  
16 *Nagoya City University; 1, Kawasumi, Mizuho-cho, Nagoya, Aichi, 467-8601, Japan: <sup>d</sup>WPI-ICReDD,*  
17 *Hokkaido University; N21 W10, Kita-ku, Sapporo, Hokkaido, 001-0021, Japan.*

18

19 \* Correspondence e-mail: [ieda@pharm.hokudai.ac.jp](mailto:ieda@pharm.hokudai.ac.jp), [deco@phar.nagoya-cu.ac.jp](mailto:deco@phar.nagoya-cu.ac.jp)

## 1 **General Procedure**

2 Proton nuclear magnetic resonance spectra ( $^1\text{H-NMR}$ ) and carbon nuclear magnetic resonance spectra  
3 ( $^{13}\text{C-NMR}$ ) were recorded on a JEOL JNM-LA500, JEOL JNM-A500, Varian VNMRS 500 or JEOL  
4 JNM-ECZ500 in the indicated solvent. Chemical shifts ( $\delta$ ) were reported in parts per million relative  
5 to the internal standard tetramethylsilane. High resolution mass spectra (HRMS) were recorded on a  
6 JEOL JMS-SX102A mass spectrometer. Ultraviolet-visible spectra were recorded on an Agilent 8453  
7 spectrophotometer. Fluorescence spectra were recorded on a RF-5300 PC (Shimadzu). Analytical  
8 HPLC was performed with a Shimadzu instrument equipped with an Inertsil ODS-3 column (4.6 $\times$ 150  
9 mm, GL Sciences Inc., Japan). Reagents and solvents were purchased from Merck, Tokyo Chemical  
10 Industries, FUJIFILM Wako Pure Chemical Corporation, Kanto Chemical, Katayama Chemical,  
11 Nacalai Tesque, Junsei Chemical, Kishida Chemical, and Apollo Scientific, and were used without  
12 purification. Flash column chromatography was performed using Silica Gel 60 (particle size 0.046–  
13 0.063 mm) supplied by Taiko-Shoji. Photoirradiation was performed by using the LED light (CL-1501,  
14 Asahi Spectra).

15

## 1 Synthetic scheme for 6–9

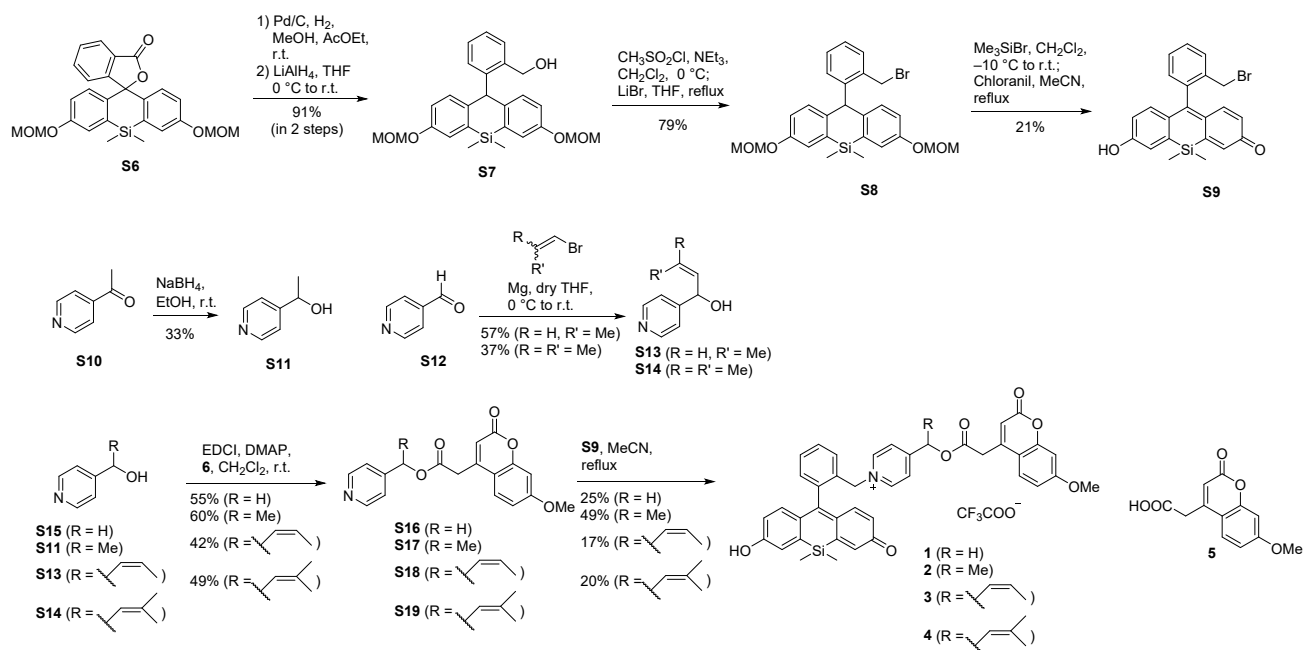

2

3

## 4 Synthesis of S7

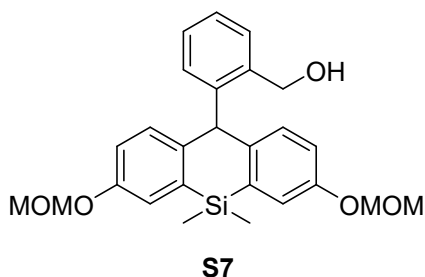

5

6 Synthesis of **S7**: **S6** was synthesized based on the reported procedure.<sup>S1</sup> To a solution of **S1** (797 mg,

7 1.72 mmol, 1.0 equiv.) in a mixture of MeOH and AcOEt (10 mL + 10 mL) was added 10% Pd/C (183

8 mg, 0.172 mmol, 0.10 equiv.). After stirring at room temperature for 15 h under a hydrogen balloon,

9 the reaction mixture was filtered on Celite to remove Pd/C. The filtrate was concentrated *in vacuo* to

10 obtain a carboxylic acid derivative as a white solid. To a slurry of lithium aluminum hydride (531 mg,

11 14.0 mmol, 8.0 equiv.) in dry THF (10 mL) was added a solution of the carboxylic acid derivative in

12 dry THF (5+5 mL) on an ice water bath under an argon balloon. After stirring at room temperature for

13 3.5 h, to the reaction mixture was slowly added water (0.6 mL) followed by 2 N NaOH (1.2 mL), and

14 further water (1.8 mL) on an ice water bath. After stirring on the ice water bath for an hour, the

1 precipitate was removed by filtration on Celite. The filtrate was concentrated in vacuo and purified by  
2 MPLC (*n*-hexane/AcOEt = 73/27 → 52/48) to obtain **S7** (714 mg, 1.58 mmol, 91% in 2 steps) as a  
3 clear oil: <sup>1</sup>H-NMR (CDCl<sub>3</sub>, 500 MHz, δ; ppm) 7.41–7.39 (1H, m), 7.25 (2H, d, *J* = 2.7 Hz), 7.21–  
4 7.18(2H, m), 7.13–7.12 (1H, m), 7.01 (2H, d, *J* = 8.8 Hz), 6.88 (2H, dd, *J* = 2.8, 8.6 Hz), 5.66 (1H, s),  
5 5.12 (4H, s), 4.56 (2H, s), 3.43 (6H, s), 0.63 (3H, s), 0.43 (3H, s); <sup>13</sup>C-NMR(CDCl<sub>3</sub>, 100 MHz, δ; ppm)  
6 154.94, 144.78, 141.75, 137.99, 134.67, 131.53, 130.74, 129.77, 128.20, 126.81, 120.28, 117.41,  
7 94.49, 63.27, 56.03, 50.02, –0.44, –1.26; HRMS (ESI<sup>+</sup>): cald. 473.17547; found 473.17447 [(M+Na)<sup>+</sup>]  
8 (–1.00 mDa).

9

## 10 Synthesis of **S8**

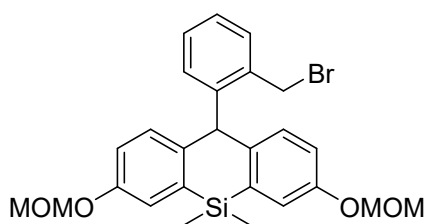

11 **S8**

12 To a solution of **S7** (548 mg, 1.22 mmol, 1.0 equiv.) in CH<sub>2</sub>Cl<sub>2</sub> (10 mL) were added triethylamine (340  
13 μL, 2.44 mmol, 2.0 equiv.) and methanesulfonyl chloride (141 μL, 1.82 mmol, 1.5 equiv.) at 0 °C.  
14 After stirring at 0 °C for 15 min, the reaction mixture was diluted with CH<sub>2</sub>Cl<sub>2</sub> and washed with sat.  
15 NaHCO<sub>3</sub> aq. twice. The aqueous layer was extracted with CH<sub>2</sub>Cl<sub>2</sub> three times. The combined organic  
16 layer was washed with brine and dried over Na<sub>2</sub>SO<sub>4</sub>. Filtration, and evaporation *in vacuo* gave a yellow  
17 oil. The residue was dissolved in THF (10 mL) and to the solution was added lithium bromide (314  
18 mg, 3.62 mmol, 3.0 equiv.). After stirring at reflux temperature for an hour, the reaction mixture was  
19 quenched with water. After evaporation *in vacuo* to remove THF, the mixture was extracted with  
20 CH<sub>2</sub>Cl<sub>2</sub> three times. The organic layer was washed with brine and dried over Na<sub>2</sub>SO<sub>4</sub>. Filtration, and  
21 evaporation *in vacuo* gave **S8** (495 mg, 0.964 mmol, 79%) as an orange oil: <sup>1</sup>H-NMR (CDCl<sub>3</sub>, 500  
22 MHz, δ; ppm) 7.46–7.44 (1H, m), 7.25 (2H, d, *J* = 3.1 Hz), 7.20 (2H, dd, *J* = 3.2 Hz, 5.5 Hz), 7.04

1 (3H, dd,  $J = 5.7\text{Hz}, 9.2\text{ Hz}$ ), 6.92 (2H, dd,  $J = 2.9\text{ Hz}, 8.7\text{ Hz}$ ), 5.71 (1H, s), 5.16 (4H, s), 4.62 (2H, s),  
2 3.47 (6H, s), 0.63 (3H, s), 0.44 (3H, s);  $^{13}\text{C-NMR}$ ( $\text{CDCl}_3$ , 100 MHz,  $\delta$ ; ppm) 155.03, 145.38, 141.41,  
3 135.02, 134.91, 131.69, 131.63, 130.86, 129.12, 126.87, 120.35, 117.35, 94.50, 56.03, 49.00, 31.95, –  
4 0.59, –1.26; HRMS (ESI<sup>+</sup>): cald. 535.09107; found 535.09079 [(M+Na)<sup>+</sup>] (–0.28 mDa).

5

## 6 Synthesis of S9

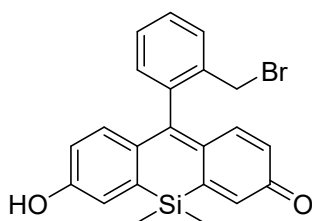

7

**S9**

8 To a solution of **S8** (495 mg, 0.964 mmol, 1.0 equiv.) in dry  $\text{CH}_2\text{Cl}_2$  (7 mL) was added  
9 bromotrimethylsilane (1.25 mL, 9.64 mmol, 10 equiv.) at  $-10\text{ }^\circ\text{C}$  via syringe pump (0.125 mL/min).  
10 After stirring at room temperature for 2 h, the reaction mixture was diluted with  $\text{CH}_2\text{Cl}_2$  and washed  
11 with water three times. The aqueous layer was extracted with  $\text{CH}_2\text{Cl}_2$ . The combined organic layer  
12 was washed with brine and dried over  $\text{Na}_2\text{SO}_4$ . After filtration and evaporation *in vacuo*, the residue  
13 was dissolved in MeCN (7 mL). To the reaction mixture was added chloranil (711 mg, 2.89 mmol, 3.0  
14 equiv.). After stirring at reflux temperature for 2 h, the reaction mixture was concentrated *in vacuo*.  
15 The residue was dissolved in  $\text{CH}_2\text{Cl}_2$  and the precipitate was removed using a Kiriya funnel. The  
16 filtrate was concentrated *in vacuo* and purified by MPLC (*n*-hexane/AcOEt = 60/40  $\rightarrow$  40/60) to obtain  
17 **S9** (86 mg, 0.204 mmol, 21%) as a red solid:  $^1\text{H-NMR}$  ( $\text{CDCl}_3$ , 500 MHz,  $\delta$ ; ppm) 7.59 (1H, d,  $J = 7.2$   
18 Hz), 7.49 (1H, ddd,  $J = 1.2\text{ Hz}, 7.5\text{ Hz}, 7.9\text{ Hz}$ ), 7.41 (1H, ddd,  $J = 1.2\text{ Hz}, 7.7\text{ Hz}, 7.5\text{ Hz}$ ), 7.12 (1H,  
19 d,  $J = 6.6\text{ Hz}$ ), 7.05 (2H, d,  $J = 2.3\text{ Hz}$ ), 6.88 (2H, d,  $J = 9.6\text{ Hz}$ ), 6.53 (2H, dd,  $J = 2.4\text{ Hz}, 9.3\text{ Hz}$ ),  
20 4.21 (2H, s), 0.43 (3H, s), 0.42 (3H, s); HRMS (ESI<sup>+</sup>): cald. 423.04105; found 423.04070 [(M+H)<sup>+</sup>] (–  
21 0.35 mDa).

22

1

## 2 Synthesis of **S11**

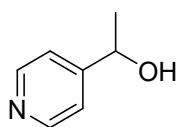

3

### **S11**

4 To a solution of **S10** (551  $\mu$ L, 5.00 mmol, 1.0 eq.) in EtOH (5 mL) was added NaBH<sub>4</sub> (232 mg, 6.13  
5 mmol, 1.2 eq.). After stirring at room temperature for 2.5 h, the reaction was quenched with water and  
6 the mixture was extracted with DCM three times. The combined organic layer was washed with brine,  
7 and dried over Na<sub>2</sub>SO<sub>4</sub>. Filtration, evaporation *in vacuo* and purification by MPLC (DCM/MeOH =  
8 97/3→90/10→85/15) and gave **S11** (202 mg, 1.64 mmol, 33%) as a clear oil: <sup>1</sup>H-NMR (CDCl<sub>3</sub>, 500  
9 MHz,  $\delta$ ; ppm) 8.49 (2H, dd,  $J$  = 1.4 Hz, 3.0 Hz), 7.31–7.30 (2H, m), 4.90 (1H, q,  $J$  = 6.5 Hz), 3.47  
10 (1H, s), 1.49 (1H, d,  $J$  = 6.8 Hz); <sup>13</sup>C-NMR(CDCl<sub>3</sub>, 100 MHz,  $\delta$ ; ppm) 155.22, 149.59, 120.49, 68.67,  
11 25.10; HRMS (ESI<sup>+</sup>): calcd. 124.07569; found 124.07563 [ $M^+$ ] (−0.06 mDa).

12

## 13 Synthesis of **S13**

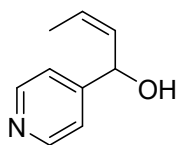

14

### **S13**

15 A mixture of magnesium turnings (202 mg, 8.31 mmol, 5.0 eq.) and iodine crystals was heated under  
16 an argon balloon until a purple vapor was observed. The reaction mixture was allowed to warm to  
17 room temperature, then THF (10 mL) was added followed by 1-bromo-1-propene (558  $\mu$ L, 6.60 mmol,  
18 4.0 eq.). The mixture was stirred at 40 °C for 15 min, and at room temperature for 2 h. In another two-  
19 necked flask, **S12** (354  $\mu$ L, 3.75 mmol, 1.0 eq.) was dissolved in dry THF (20 mL) under an argon  
20 balloon. The mixture was cooled on an ice water bath, and the prepared Grignard reagent solution  
21 (0.65 mol/L, 7.00 mL, 4.55 mmol, 1.2 eq.) was slowly added. After stirring on ice water bath for 10  
22 min, the mixture was allowed to warm to room temperature and stirred for 19 h. Then, sat. NH<sub>4</sub>Cl aq.

1 was added, and the aqueous layer was extracted with AcOEt three times. The combined organic layer  
2 was washed with brine and dried over Na<sub>2</sub>SO<sub>4</sub>. Filtration, evaporation *in vacuo*, and purification by  
3 MPLC (CH<sub>2</sub>Cl<sub>2</sub>/CH<sub>3</sub>OH = 96/4) gave **S13** (319 mg, 2.14 mmol, 57%) as a purple solid: <sup>1</sup>H-NMR  
4 (CDCl<sub>3</sub>, 500 MHz, δ; ppm) 8.57 (2H, dd, *J* = 1.6 Hz, 4.5 Hz), 7.31 (2H, dd, *J* = 1.6 Hz, 4.7 Hz),  
5 5.78–5.74 (1H, m), 5.60–5.54 (2H, m), 1.84 (3H, dd, *J* = 1.6 Hz, 7.3 Hz); <sup>13</sup>C-NMR(CDCl<sub>3</sub>, 100 MHz,  
6 δ; ppm)152.97, 149.64, 131.93, 127.81, 120.97, 67.89, 13.58; HRMS (ESI<sup>+</sup>): cald. 150.09134; found  
7 150.09124 [(M+H)<sup>+</sup>] (–1.66 mDa).

8

### 9 Synthesis of **S14**

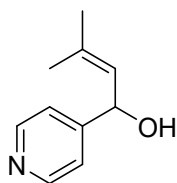

10 **S14**

11 A mixture of magnesium turnings (141 mg, 5.80 mmol, 4.0 eq.) and iodine crystals was heated under  
12 an argon balloon until a purple vapor was observed. The mixture was allowed to warm to room  
13 temperature, then dry THF (5.2 mL) was added, followed by the addition of 1-bromo-2-methyl-1-  
14 propene (451 μL, 4.40 mmol, 3.0 eq.). The mixture was stirred at reflux temperature for 4 h. In another  
15 two-necked flask, **S12** (139 μL, 1.47 mmol, 1.0 eq.) was dissolved in dry THF (11 mL) under an argon  
16 balloon. The mixture was cooled on an ice water bath, followed by slowly adding the prepared  
17 Grignard reagent (0.85 mol/L, 1.90 mL, 1.1 eq.). After stirring on ice water bath for 10 min, the mixture  
18 was allowed to warm to room temperature and stirred for 18 h. Then, sat. NH<sub>4</sub>Cl aq. was added, and  
19 the aqueous layer was extracted with AcOEt three times. The organic layer was washed with brine and  
20 dried over Na<sub>2</sub>SO<sub>4</sub>. Filtration, evaporation *in vacuo*, and purification by MPLC (CH<sub>2</sub>Cl<sub>2</sub>/MeOH =  
21 96/4) gave **S14** (89.2 mg, 0.547 mmol, 37%) as a white solid: <sup>1</sup>H-NMR (CDCl<sub>3</sub>, 500 MHz, δ; ppm)  
22 8.41 (2H, d, *J* = 4.8 Hz), 7.31 (2H, d, *J* = 6.2 Hz), 5.44 (1H, d, *J* = 9.0 Hz), 5.30–5.29 (1H, m), 1.79  
23 (3H, s), 1.75 (3H, s); <sup>13</sup>C-NMR(CDCl<sub>3</sub>, 100 MHz, δ; ppm)153.26, 149.73, 137.00, 126.68, 120.89,

1 69.35, 25.91, 18.52; HRMS (ESI<sup>+</sup>): cald. 164.10699; found 164.10684 [(M+H)<sup>+</sup>] (-0.15 mDa).

2

### 3 Synthesis of **S16–19**

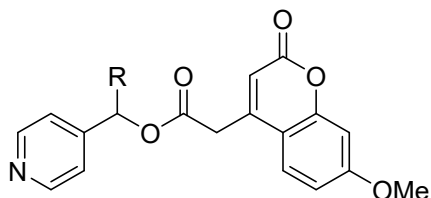

**S16** (R = H)

**S17** (R = Me)

**S18** (R = 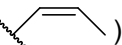)

**S19** (R = 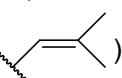)

4

5 To a mixture of an alcohol derivative (**S11**, **S13–15**, 1.0 equiv.), **6** (1.2 eq.) and *N,N*-dimethyl-4-  
6 aminopyridine (0.85 eq.) in CH<sub>2</sub>Cl<sub>2</sub> (0.2 mol/L) was added EDCI (1.2 eq.). The reaction was monitored  
7 by TLC to confirm completion. The reaction was quenched with water and the mixture was extracted  
8 with CH<sub>2</sub>Cl<sub>2</sub> three times. The combined organic layer was washed with brine and dried over Na<sub>2</sub>SO<sub>4</sub>.  
9 Filtration, evaporation *in vacuo* and purification by MPLC (CH<sub>2</sub>Cl<sub>2</sub>/MeOH = 90/10) gave the ester  
10 derivative (42–60%).

11 **S16**: <sup>1</sup>H-NMR (CDCl<sub>3</sub>, 500 MHz, δ; ppm) 8.58 (2H, d, *J* = 6.0 Hz), 7.44 (1H, d, *J* = 8.7 Hz), 7.16 (2H,  
12 d, *J* = 6.3 Hz), 6.86–6.82 (2H, m), 6.26 (1H, s), 5.17 (2H, s), 3.88 (3H, s), 3.82 (2H, s); <sup>13</sup>C-  
13 NMR(CDCl<sub>3</sub>, 100 MHz, δ; ppm) 168.39, 163.10, 160.75, 155.71, 150.27, 147.58, 143.90, 125.47,  
14 122.05, 114.09, 112.72, 112.32, 101.30, 65.45, 55.93, 38.16; HRMS (ESI<sup>+</sup>): cald. 326.10230; found  
15 326.10178 [(M+H)<sup>+</sup>] (-0.52 mDa).

16 **S17**: <sup>1</sup>H-NMR (CDCl<sub>3</sub>, 500 MHz, δ; ppm) 8.54 (2H, dd, *J* = 1.7 Hz, 4.6 Hz), 7.43–7.41 (1H, m), 7.15  
17 (2H, dd, *J* = 1.7 Hz, 4.5 Hz), 6.87–6.78 (2H, m), 6.25 (1H, s), 5.86 (1H, q, *J* = 6.7 Hz), 3.86 (3H, s),  
18 3.82 (2H, s), 1.52 (3H, d, *J* = 6.5 Hz); <sup>13</sup>C-NMR(CDCl<sub>3</sub>, 100 MHz, δ; ppm) 167.84, 163.00, 160.70,  
19 155.61, 150.21, 149.40, 147.74, 125.46, 120.56, 113.91, 112.53, 112.28, 101.23, 72.28, 55.84, 38.41,  
20 21.70; HRMS (ESI<sup>+</sup>): cald. 340.11795; found 340.11736 [(M+H)<sup>+</sup>] (-0.59 mDa).

21 **S18**: <sup>1</sup>H-NMR (CDCl<sub>3</sub>, 500 MHz, δ; ppm) 8.54 (2H, d, *J* = 5.8 Hz), 7.43 (1H, d, *J* = 8.7 Hz), 7.14 (2H,

1 d,  $J = 6.1$  Hz), 6.88–6.79 (2H, m), 6.58 (1H, d,  $J = 9.3$  Hz), 6.26 (1H, s), 5.85–5.79 (1H, m), 5.51–5.47  
2 (1H, m), 3.87 (3H, s), 3.82 (2H, s), 1.82 (3H, dd,  $J = 1.8$  Hz, 6.9 Hz);  $^{13}\text{C-NMR}$  ( $\text{CDCl}_3$ , 100 MHz,  $\delta$ ;  
3 ppm) 167.79, 163.01, 160.76, 155.61, 150.16, 147.86, 132.58, 130.87, 127.46, 126.62, 125.55, 120.98,  
4 113.90, 112.58, 101.22, 71.25, 56.89, 38.34, 13.69; HRMS ( $\text{ESI}^+$ ): cald. 366.13360; found 366.13322  
5  $[(\text{M}+\text{H})^+]$  ( $-0.38$  mDa).

6 **S19**:  $^1\text{H-NMR}$  ( $\text{CDCl}_3$ , 500 MHz,  $\delta$ ; ppm) 8.52 (2H, s), 7.41 (1H, d,  $J = 8.7$  Hz), 7.12 (2H, d,  $J = 4.1$   
7 Hz), 6.82–6.79 (2H, m), 6.49 (1H, d,  $J = 9.3$  Hz), 6.25 (1H, s), 5.26 (1H, d,  $J = 8.2$  Hz), 3.87–3.86  
8 (3H, m), 3.81 (2H, s), 1.82 (3H, s), 1.76 (3H, s);  $^{13}\text{C-NMR}$  ( $\text{CDCl}_3$ , 100 MHz,  $\delta$ ; ppm) 167.79, 162.93,  
9 160.75, 155.56, 149.96, 148.44, 147.85, 140.16, 126.78, 126.43, 125.49, 121.33, 120.96, 113.87,  
10 112.50, 112.28, 101.12, 72.73, 55.82, 38.40, 25.84, 18.65; HRMS ( $\text{ESI}^+$ ): cald. 380.14925; found  
11 380.14859  $[(\text{M}+\text{H})^+]$  ( $-0.66$  mDa).

12

### 13 Synthesis of 1–4

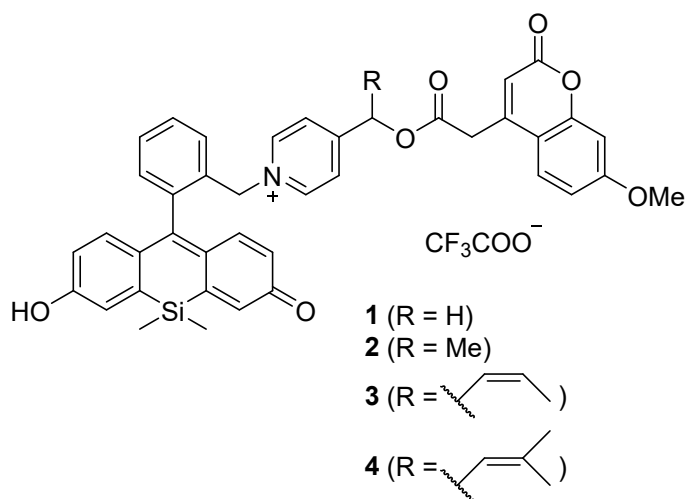

15 To a solution of **S9** in MeCN (0.01–0.02 mol/L) was added **S16–19** (1.9–2.5 equiv.). After stirring at  
16 reflux for 1–3 days, the mixture was concentrated *in vacuo*. The residue was purified by preparative  
17 HPLC to obtain the picolinium cation derivative (17–49%) as a red solid.

18 **1**:  $^1\text{H-NMR}$  ( $\text{CD}_3\text{CN}$ , 500 MHz,  $\delta$ ; ppm) 8.28 (2H, d,  $J = 6.6$  Hz), 7.80–7.78 (1H, m), 7.72–7.67 (2H,  
19 m), 7.65–7.63 (1H, m), 7.53 (2H, d,  $J = 6.4$  Hz), 7.30–7.28 (1H, m), 7.02 (2H, d,  $J = 2.3$  Hz), 6.94–

1 6.92 (2H, m), 6.46 (2H, d,  $J = 9.5$  Hz), 6.29 (1H, s), 6.22 (2H, dd,  $J = 2.2$  Hz, 9.5 Hz), 5.44 (2H, s),  
2 5.19 (2H, s), 4.01 (2H, s), 3.88 (3H, s), 0.60 (3H, s), 0.42 (3H, s);  $^{13}\text{C}$ -NMR ( $\text{CD}_3\text{CN}$ , 125 MHz,  $\delta$ ;  
3 ppm) 169.36, 163.91, 161.39, 157.27, 156.47, 152.83, 149.35, 145.16, 144.76, 141.79, 138.64, 133.18,  
4 131.69, 131.53, 131.31, 130.59, 130.34, 127.29, 125.94, 123.31, 114.57, 114.56, 113.35, 113.05,  
5 101.98, 64.46, 63.68, 56.67, 56.66, 37.74, -0.77, -1.68; HRMS (ESI<sup>+</sup>): calcd: 668.21045; found:  
6 668.21158 [ $\text{M}^+$ ] (+1.13 mDa). Purity by reverse-phase HPLC was 97.4 % (254 nm).

7 **2**:  $^1\text{H}$ -NMR ( $\text{CD}_3\text{CN}$ , 500 MHz,  $\delta$ ; ppm) 8.28 (2H, d,  $J = 6.7$  Hz), 7.80 (1H, d,  $J = 8.0$  Hz), 7.73–7.67  
8 (2H, m), 7.55–7.54 (3H, m), 7.28 (1H, dd,  $J = 1.8$  Hz, 6.9 Hz), 7.01 (2H, dd,  $J = 2.4$  Hz, 6.0 Hz), 6.91–  
9 6.88 (2H, m), 6.52–6.46 (2H, m), 6.24–6.19 (3H, m), 5.82 (1H, q,  $J = 6.7$  Hz), 5.42 (2H, s), 3.92 (2H,  
10 d,  $J = 2.3$  Hz), 3.86 (3H, s), 1.36 (1H, d,  $J = 6.6$  Hz), 0.58 (3H, s), 0.43 (3H, s);  $^{13}\text{C}$ -NMR ( $\text{CD}_3\text{CN}$ ,  
11 125 MHz,  $\delta$ ; ppm) 169.08, 163.88, 161.96, 161.36, 156.45, 149.41, 145.41, 141.88, 138.80, 138.66,  
12 133.37, 131.75, 131.57, 131.12, 130.49, 130.42, 130.36, 127.26, 125.35, 123.39, 123.14, 114.57,  
13 114.56, 113.32, 113.02, 101.96, 71.70, 63.67, 56.67, 38.05, 21.64, -0.82, -1.45; HRMS (ESI<sup>+</sup>): calcd:  
14 682.22610; found: 682.22828 [ $\text{M}^+$ ] (+2.17 mDa). Purity by reverse-phase HPLC was 99.0 % (254 nm).

15 **3**:  $^1\text{H}$ -NMR ( $\text{CD}_3\text{CN}$ , 500 MHz,  $\delta$ ; ppm) 8.26 (2H, d,  $J = 6.8$  Hz), 7.80 (1H, dd,  $J = 2.0$  Hz, 9.0 Hz),  
16 7.67–7.73 (2H, m), 7.55 (1H, d,  $J = 8.8$  Hz), 7.50 (2H, d,  $J = 6.7$  Hz), 7.27 (1H, dd,  $J = 1.8$  Hz, 8.7  
17 Hz), 7.00 (2H, dd,  $J = 2.0$  Hz), 6.93–6.89 (2H, m), 6.51 (2H, dd,  $J = 2.0$  Hz, 7.5 Hz), 6.47 (1H, d,  $J =$   
18 9.4 Hz), 6.25–6.18 (3H, m), 5.92–5.89 (1H, m), 5.42 (2H, s), 5.20–5.15 (1H, s), 3.95 (2H, s), 3.87 (3H,  
19 s), 1.79 (3H, dd,  $J = 1.7$  Hz, 5.2 Hz), 0.57 (3H, s), 0.43 (3H, s);  $^{13}\text{C}$ -NMR ( $\text{CD}_3\text{CN}$ , 125 MHz,  $\delta$ ; ppm)  
20 168.70, 163.94, 161.39, 159.98, 156.50, 153.36, 149.38, 145.43, 145.05, 141.71, 138.90, 138.82,  
21 133.95, 133.40, 131.84, 131.63, 131.12, 130.84, 130.44, 127.17, 125.63, 125.57, 123.24, 123.17,  
22 114.53, 113.29, 113.06, 102.01, 70.85, 63.75, 56.69, 38.10, 13.96, -0.86, -1.55; HRMS (ESI<sup>+</sup>): calcd:  
23 708.24175; found: 708.24582 [ $\text{M}^+$ ] (+4.06 mDa).; Purity by reverse-phase HPLC was 98.1% (254  
24 nm).

25 **4**:  $^1\text{H}$ -NMR ( $\text{CD}_3\text{CN}$ , 500 MHz,  $\delta$ ; ppm) 8.25 (2H, d,  $J = 6.6$  Hz), 7.79 (1H, dd,  $J = 1.6$  Hz, 6.9 Hz),  
26 7.73–7.68 (2H, m), 7.54 (1H, d,  $J = 8.8$  Hz), 7.49 (2H, d,  $J = 6.4$  Hz), 7.28 (1H, dd,  $J = 1.5$  Hz, 6.8

1 Hz), 7.00 (2H, dd,  $J = 2.7$  Hz), 6.92–6.89 (2H, m), 6.50 (2H, dd,  $J = 9.6$  Hz), 6.43 (1H, d,  $J = 9.4$  Hz),  
2 6.26–6.19 (3H, m), 5.42 (2H, s), 4.95 (1H, d,  $J = 9.5$  Hz), 3.93 (2H, s), 3.87 (3H, s), .1.79 (6H, dd,  $J =$   
3 1.1 Hz, 16.8 Hz), 0.57 (3H, s), 0.43 (3H, s);  $^{13}\text{C-NMR}$  ( $\text{CD}_3\text{CN}$ , 125 MHz,  $\delta$ ; ppm) 168.79, 163.95,  
4 161.40, 160.50, 156.50, 153.37, 149.47, 145.32, 145.11, 145.02, 143.90, 141.71, 138.87, 133.38,  
5 131.84, 131.63, 131.16, 130.90, 130.81, 130.45, 127.18, 125.66, 120.15, 114.50, 113.31, 113.01,  
6 102.02, 72.27, 63.73, 56.70, 38.20, 25.82, 18.95,  $-0.83$ ,  $-1.56$ ; HRMS ( $\text{ESI}^+$ ): calcd: 722.25740;  
7 found: 722.26123 [ $\text{M}^+$ ] ( $+3.83$  mDa).; Purity by reverse-phase HPLC was 97.2 % (254 nm).

8

## 1 Synthetic scheme for 7

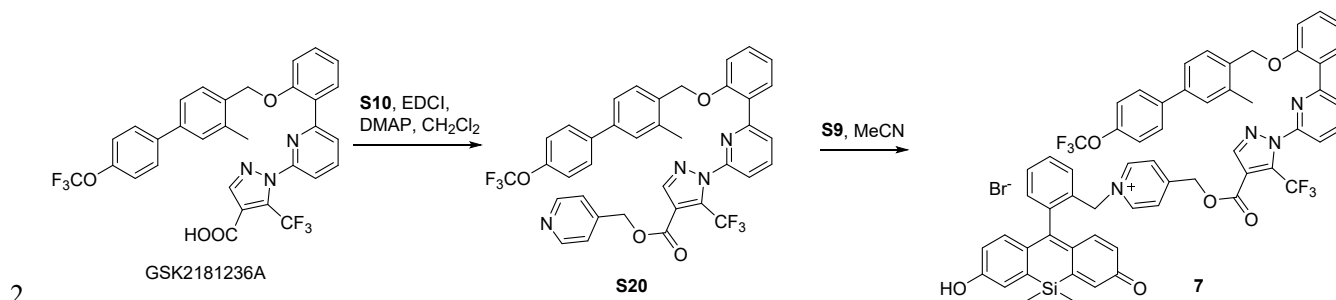

## 3 Synthesis of S20

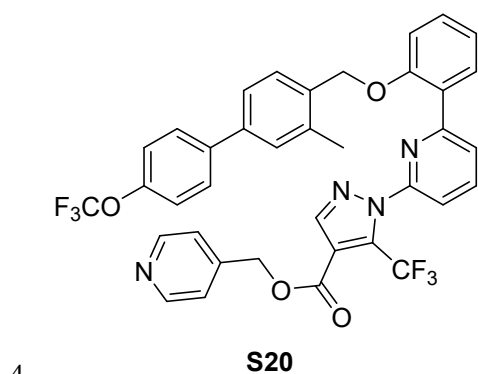

5 To a solution of GSK2181236A (307 mg, 0.500 mmol, 1.0 equiv.), **S15** (65 mg, 0.596 mmol, 1.2

6 equiv.), and 4-*N,N*-dimethylaminopyridine (61 mg, 0.499 mmol, 1.0 equiv.) in CH<sub>2</sub>Cl<sub>2</sub> (10 mL) was

7 added EDCI (105 mg, 0.548 mmol, 1.1 equiv.). After stirring at room temperature for an hour, the

8 reaction mixture was poured into sat. NH<sub>4</sub>Cl (50 mL) and water (50 mL) and extracted with CH<sub>2</sub>Cl<sub>2</sub>

9 three times. The organic layer was washed with brine and dried over Na<sub>2</sub>SO<sub>4</sub>. Filtration, evaporation

10 *in vacuo*, and purification by MPLC (CH<sub>2</sub>Cl<sub>2</sub>/MeOH = 95/5 → 90/10 → 85/15) gave **S20** (68%) as a

11 clear oil: <sup>1</sup>H-NMR (CD<sub>3</sub>OD, 500 MHz, δ; ppm) 8.56 (2H, d, *J* = 6.3 Hz), 8.28 (1H, s), 8.10 (1H, d, *J*

12 = 8.1 Hz), 7.97 (1H, dd, *J* = 8.0 Hz, 8.0 Hz), 7.83 (1H, dd, *J* = 1.7 Hz, 7.7 Hz), 7.68 (2H, d, *J* = 8.6

13 Hz), 7.61 (1H, d, *J* = 8.0 Hz), 7.51 (2H, d, *J* = 6.3 Hz), 7.46–7.41 (4H, m), 7.32 (2H, d, *J* = 8.0 Hz),

14 7.28 (1H, d, *J* = 8.1 Hz), 7.11 (1H, dd, *J* = 7.4 Hz, 7.4 Hz), 5.44 (2H, s), 5.23 (2H, s), 2.34 (3H, s);

15 <sup>13</sup>C-NMR(CDCl<sub>3</sub>, 100 MHz, δ; ppm) 160.71, 156.59, 156.55, 155.20, 151.01, 150.26, 148.76, 144.36,

16 142.68, 139.72, 139.55, 138.63, 136.89, 134.16, 130.95, 129.20, 128.84, 128.47, 127.63, 127.58,

17 126.15, 124.75, 122.03, 121.88, 121.34, 116.84, 116.65, 113.32, 69.13, 65.18, 19.12; HRMS (ESI<sup>+</sup>):

18 calcd. 705.19310; found 705.19213 [(M+H)<sup>+</sup>] (−0.97 mDa).

1

## 2 Synthesis of **7**

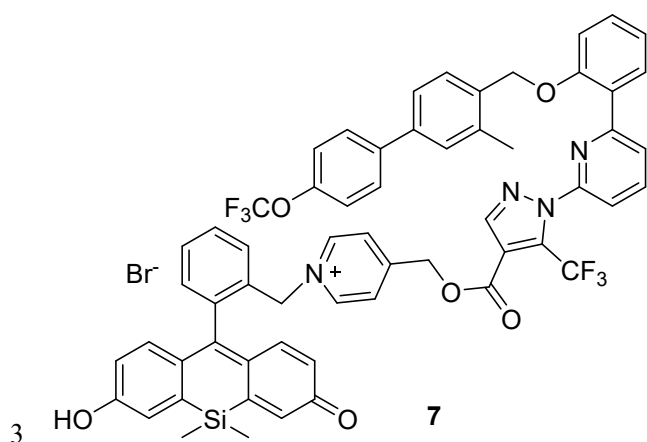

4 A solution of **S9** (114 mg, 0.340 mmol, 1.0 equiv.), and **S20** (239 mg, 0.339 mmol, 1.0 equiv.) in  
5 MeCN (10 mL) was stirred at reflux temperature for 14 h. After evaporation, the residue was  
6 recrystallized with MeCN/Et<sub>2</sub>O to obtain **7** (16%) as a red solid: <sup>1</sup>H NMR (CD<sub>3</sub>OD, 500 MHz, δ; ppm)  
7 8.62 (2H, d, *J* = 6.6 Hz), 8.37 (1H, s), 8.13 (1H, dd, *J* = 1.0 Hz, 8.0 Hz), 8.01 (1H, dd, *J* = 8.0 Hz, 8.0  
8 Hz), 7.86–7.81 (4H, m), 7.77–7.69 (4H, m), 7.64 (1H, d, *J* = 8.1 Hz), 7.48–7.41 (4H, m), 7.34–7.30  
9 (4H, m), 7.11 (1H, ddd, *J* = 0.9 Hz, 7.5 Hz, 7.5 Hz), 7.03 (2H, s), 6.61 (2H, d, *J* = 9.4 Hz), 6.28 (2H,  
10 d, *J* = 7.4 Hz), 5.61 (2H, s), 5.51 (2H, s), 5.25 (2H, s), 2.35 (3H, s), 0.63 (3H, s), 0.45 (3H, s); <sup>13</sup>C  
11 NMR (CD<sub>3</sub>OD, 125 MHz, δ; ppm) 161.03, 158.11, 157.94, 156.67, 155.71, 152.22, 149.91, 149.90,  
12 145.92, 143.99, 141.98, 141.14, 140.78, 140.24, 138.59, 135.70, 134.13, 133.80, 133.42, 132.10,  
13 131.89, 131.84, 131.00, 130.31, 129.93, 129.56, 128.77, 127.53, 126.23, 125.54, 122.98, 122.41,  
14 122.36, 121.74, 120.94, 119.59, 118.45, 117.16, 114.73, 70.20, 64.83, 64.06, 19.07, –0.82, –1.66;  
15 HRMS (ESI<sup>+</sup>): calcd. 1047.30125; found 1047.29959 [*M*<sup>+</sup>] (–1.66 mDa); Anal. Calcd. for  
16 C<sub>59</sub>H<sub>45</sub>BrF<sub>6</sub>N<sub>4</sub>O<sub>6</sub>Si•3/2H<sub>2</sub>O: C, 61.35; H, 4.19; N, 4.85. Found: C, 61.14; H, 4.22; N, 4.96.

17

## 18 Quantum chemical calculation

19 All calculations were carried with the Gaussian 16 program.<sup>S2</sup> The molecular structure optimizations  
20 were conducted at the UωB97X-D level using the cc-pVDZ basis set. Solvation was evaluated by the

1 self-consistent reaction field (SCRF) method using the polarizable continuum model (PCM,  
2 SOLVENT = Water). The intrinsic reaction coordinate (IRC) method was used to track minimum  
3 energy paths from transition structures to the corresponding local minima.<sup>S3</sup> In this study, the Gibbs  
4 free energy was adopted as the basis for discussion. All the stationary structures have no imaginary  
5 frequencies and the TS structures have one imaginary frequency.

6

### 7 **Measurement of absorption and fluorescence spectra**

8 Absorption and fluorescence spectra were measured using a UV-Vis spectrophotometer (Agilent 8453)  
9 and a fluorescence spectrophotometer (RF5300-PC), respectively. Fluorescence spectra were recorded  
10 with an excitation wavelength of 582 nm. The fluorescence quantum yield was calculated relative to  
11 compound **10** (1  $\mu$ M in 100 mM sodium phosphate buffer, pH 9.0, DMSO 1%) as a standard ( $\Phi_{fl}$  =  
12 0.42)

13

### 14 **HPLC analysis of photolysis**

15 A solution of each compound (10  $\mu$ M) in 100 mM HEPES buffer (pH 7.3, DMSO 0.1%, 10 mL) was  
16 irradiated by a 590 nm LED (41 mW/cm<sup>2</sup>) at 37 °C. After irradiation, an aliquot was subject to HPLC  
17 performed with a Shimadzu instrument equipped with an Inertsil ODS-3 column (4.6  $\times$  150 mm, GL  
18 Science Inc.). HPLC conditions were as follows: solvent A, MilliQ (0.1% TFA); solvent B, MeCN  
19 (0.1% TFA); B conc., 5 to 100% (20 min)  $\rightarrow$  100 to 100% (25 min)  $\rightarrow$  100 to 5% (26 min)  $\rightarrow$  5 to 5%  
20 (30 min).

21

### 22 **Calculation of uncaging quantum yields**

23 Measurement of the amount of **6** released during irradiation: A solution of each compound (10  $\mu$ M) in  
24 100 mM HEPES buffer (pH 7.3, 0.1% DMSO, total volume: 3 mL) was irradiated at 600 nm (**1**:  
25 bandwidth = 20 nm, for 90 s; **2**: bandwidth = 20 nm, for 30 s; **3**: bandwidth = 5 nm, for 60 s) with the  
26 Xe lamp of a fluorescence spectrometer, RF5300 (Shimadzu) at 37 °C. After irradiation, an aliquot

1 was subjected to HPLC on a Shimadzu instrument equipped with an Inertsil ODS-3 column (4.6 × 150  
2 mm, GL Science Inc., Japan). HPLC conditions were as follows: solvent A, MilliQ (0.1% TFA);  
3 solvent B, MeCN (0.1% TFA); B conc., 5 to 100% (20 min) → 100 to 100% (25 min) → 100 to 5%  
4 (26 min) → 5 to 5% (30 min). The excitation wavelength for **6** was 325 nm.

5 Measurement of the number of photons: The number of photon was determined using  
6 NH<sub>4</sub>[Cr(NH<sub>3</sub>)<sub>2</sub>(SCN)<sub>4</sub>] (Reinecke's salt) as a chemical actinometer. Reinecke's salt absorbs visible  
7 light and undergoes a photochemical ligand-exchange reaction with water, releasing thiocyanate ions  
8 (eq. S1). The liberated thiocyanate was trapped with ferric ions to form the iron(III) thiocyanate  
9 complex, and its concentration was quantified by measuring the absorbance (eq. S2). The quantum  
10 yield of this ligand-exchange reaction has been reported to be 0.28, and this value was used to calculate  
11 the incident photon flux (irradiated light dose).

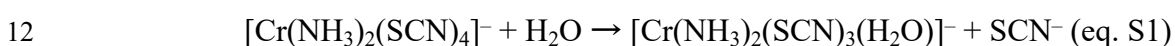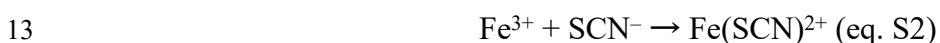

14 An aqueous solution (3 mL) of Reinecke's salt (10 mM) was irradiated under the same conditions as  
15 described above. After irradiation, an aliquot (50 μL) was mixed with 400 μL of an aqueous solution  
16 containing 0.5 M HClO<sub>4</sub> and 0.1 M Fe(NO<sub>3</sub>)<sub>3</sub> and 400 μL of MilliQ water. The absorption spectrum  
17 of the mixture was recorded on an Agilent 8453 spectrometer. The absorption spectrum of the non-  
18 irradiated mixture was also recorded. The photon number was calculated from the absorption  
19 difference ( $\lambda_{\text{max}} = 450 \text{ nm}$ ,  $\epsilon = 4300 \text{ L mol}^{-1} \text{ cm}^{-1}$ ). The calculations were performed with reference to  
20 the quantum yield of Reinecke's salt for thiocyanate anion release ( $\Phi = 0.28$ ).

21

22

### 23 **Photomanipulation of rat aorta strip**

24 An aortic strip from an 11-week-old male SD rat was placed in a Magnus tube filled with Krebs buffer  
25 at 37 °C. The tension was recorded on a LabChart7 (ADInstruments). The strip was pre-treated with  
26 L-NAME (10 μM). Pre-contraction was induced by noradrenaline (10 μM). After equilibration, **7** (10

1  $\mu\text{M}$ ), or DMSO (100  $\mu\text{L}$ ) was added, and the tube was irradiated with a CL-1501 lamp (Asahi Spectra)

2 with a 590 nm LED head (30  $\text{mW cm}^{-2}$ ) for 3 min.

3

# 1 NMR Charts

## 2 Compound 1

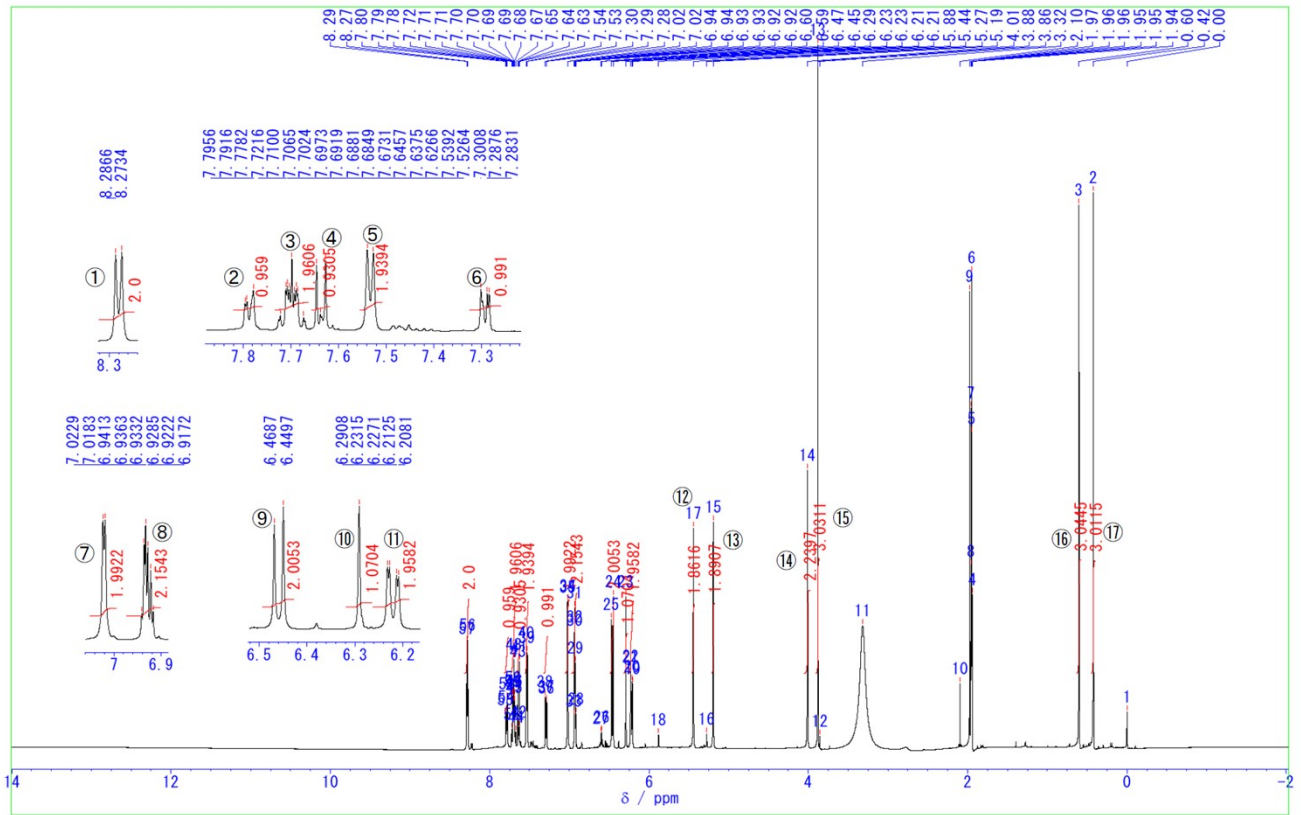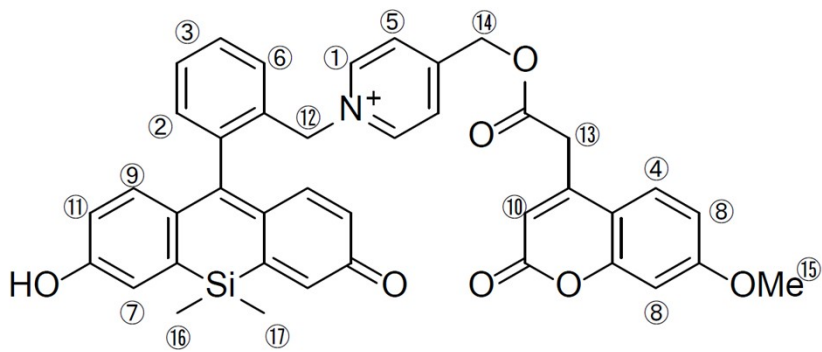

3

4



# 1 Compound 3

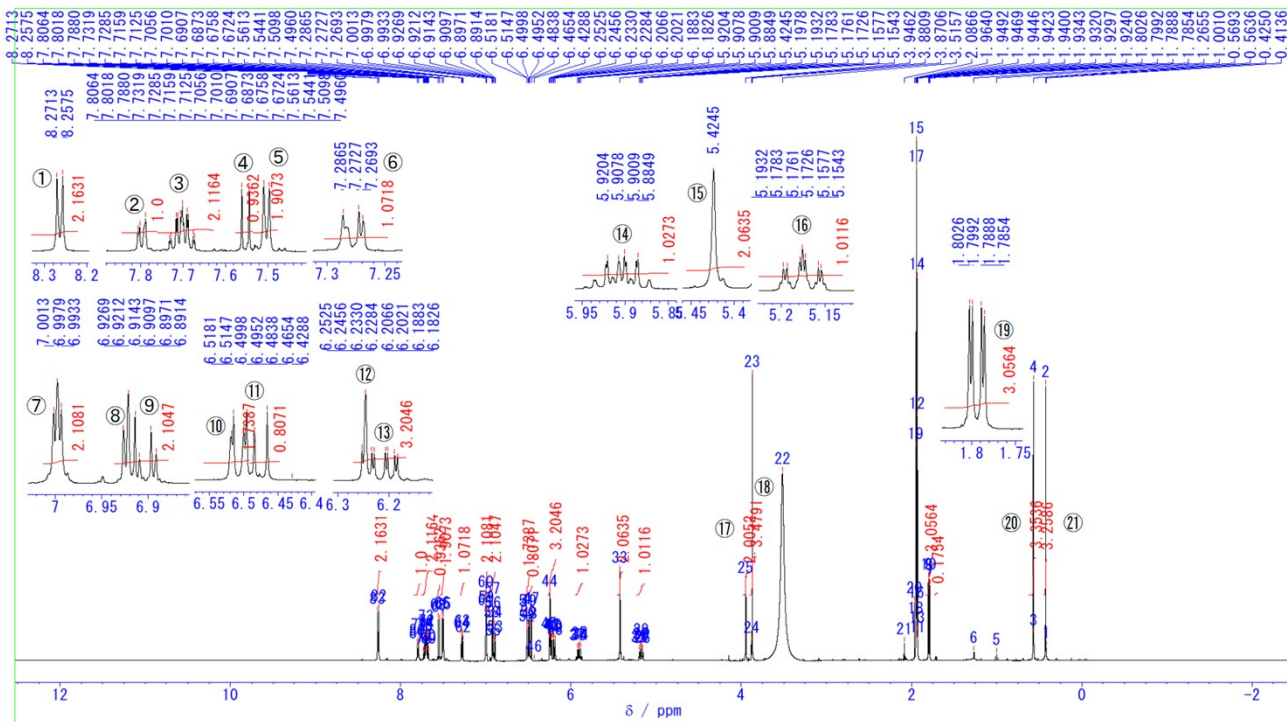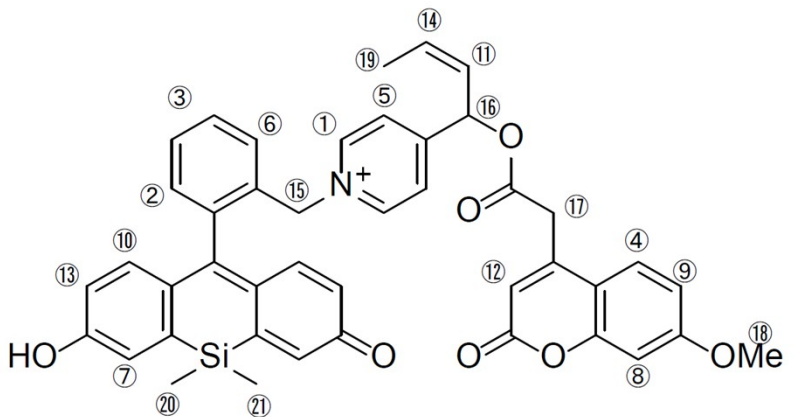

2

3

# 1 Compound 4

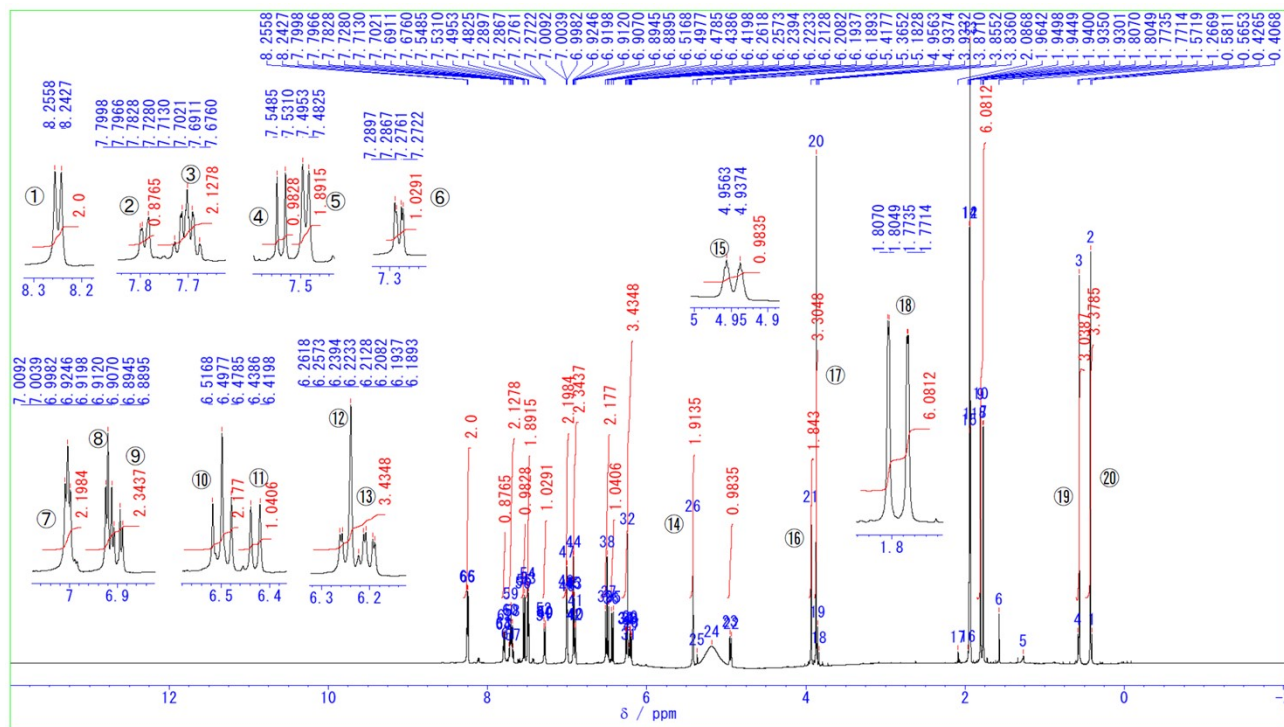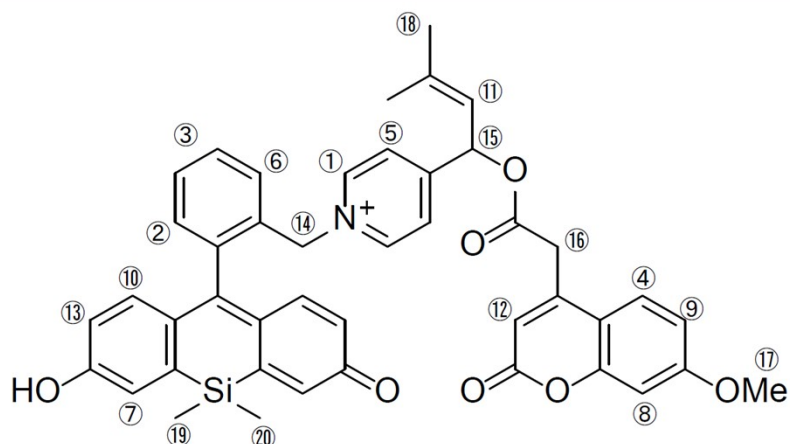

2

3



## 1 Supplementary Figures

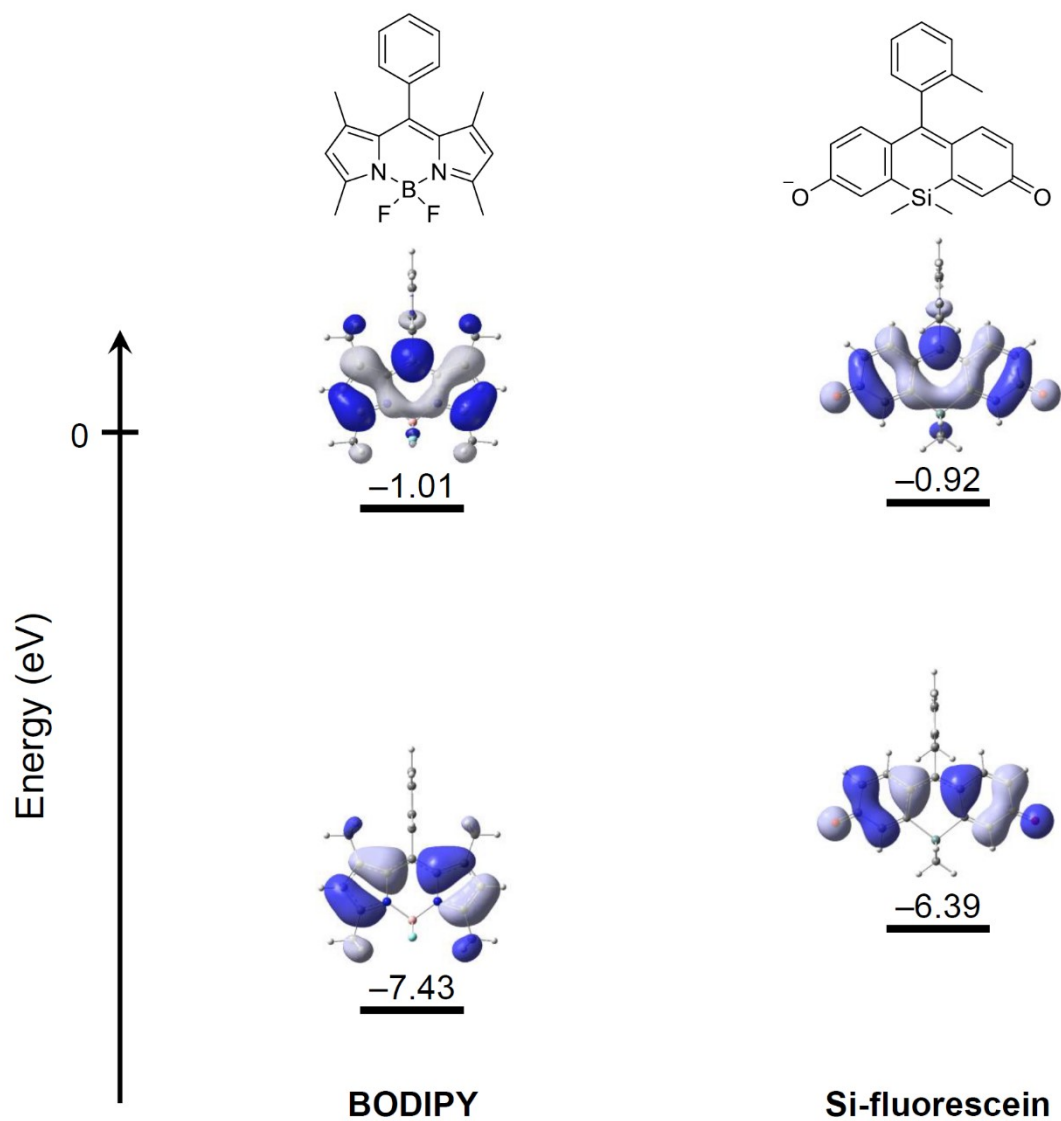

U $\omega$ B97XD/cc-pVDZ, PCM (Water)

2

3 Fig. S1 Comparison of the frontier molecular orbitals of BODIPY and Si-fluorescein. Optimized  
4 structures and HOMO/LUMO isosurfaces with their corresponding energies (eV) calculated at the  
5  $\omega$ B97XD/cc-pVDZ level with PCM (water).

6

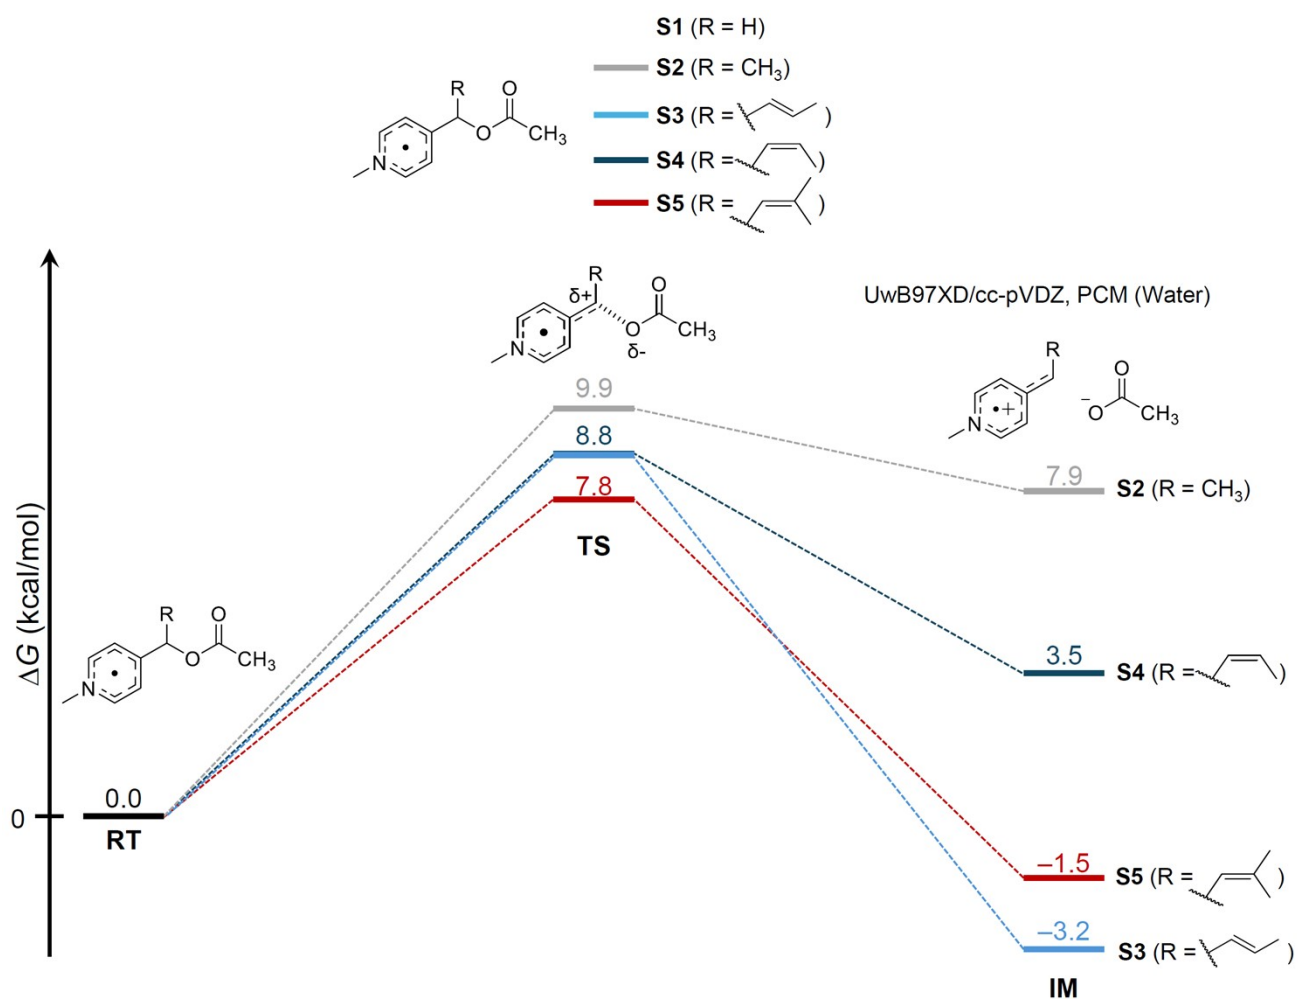

1  
 2 Fig. S2 Calculated energy diagram for the reaction pathway from the reactant (RT) to the intermediate  
 3 (IM) via the transition state (TS). The activation energy ( $\Delta E_a$ ) and the overall Gibbs free energy change  
 4 ( $\Delta G$ ) were obtained from quantum-chemical calculations performed at the UwB97X-D/cc-pVDZ level  
 5 using the PCM solvation model (water).

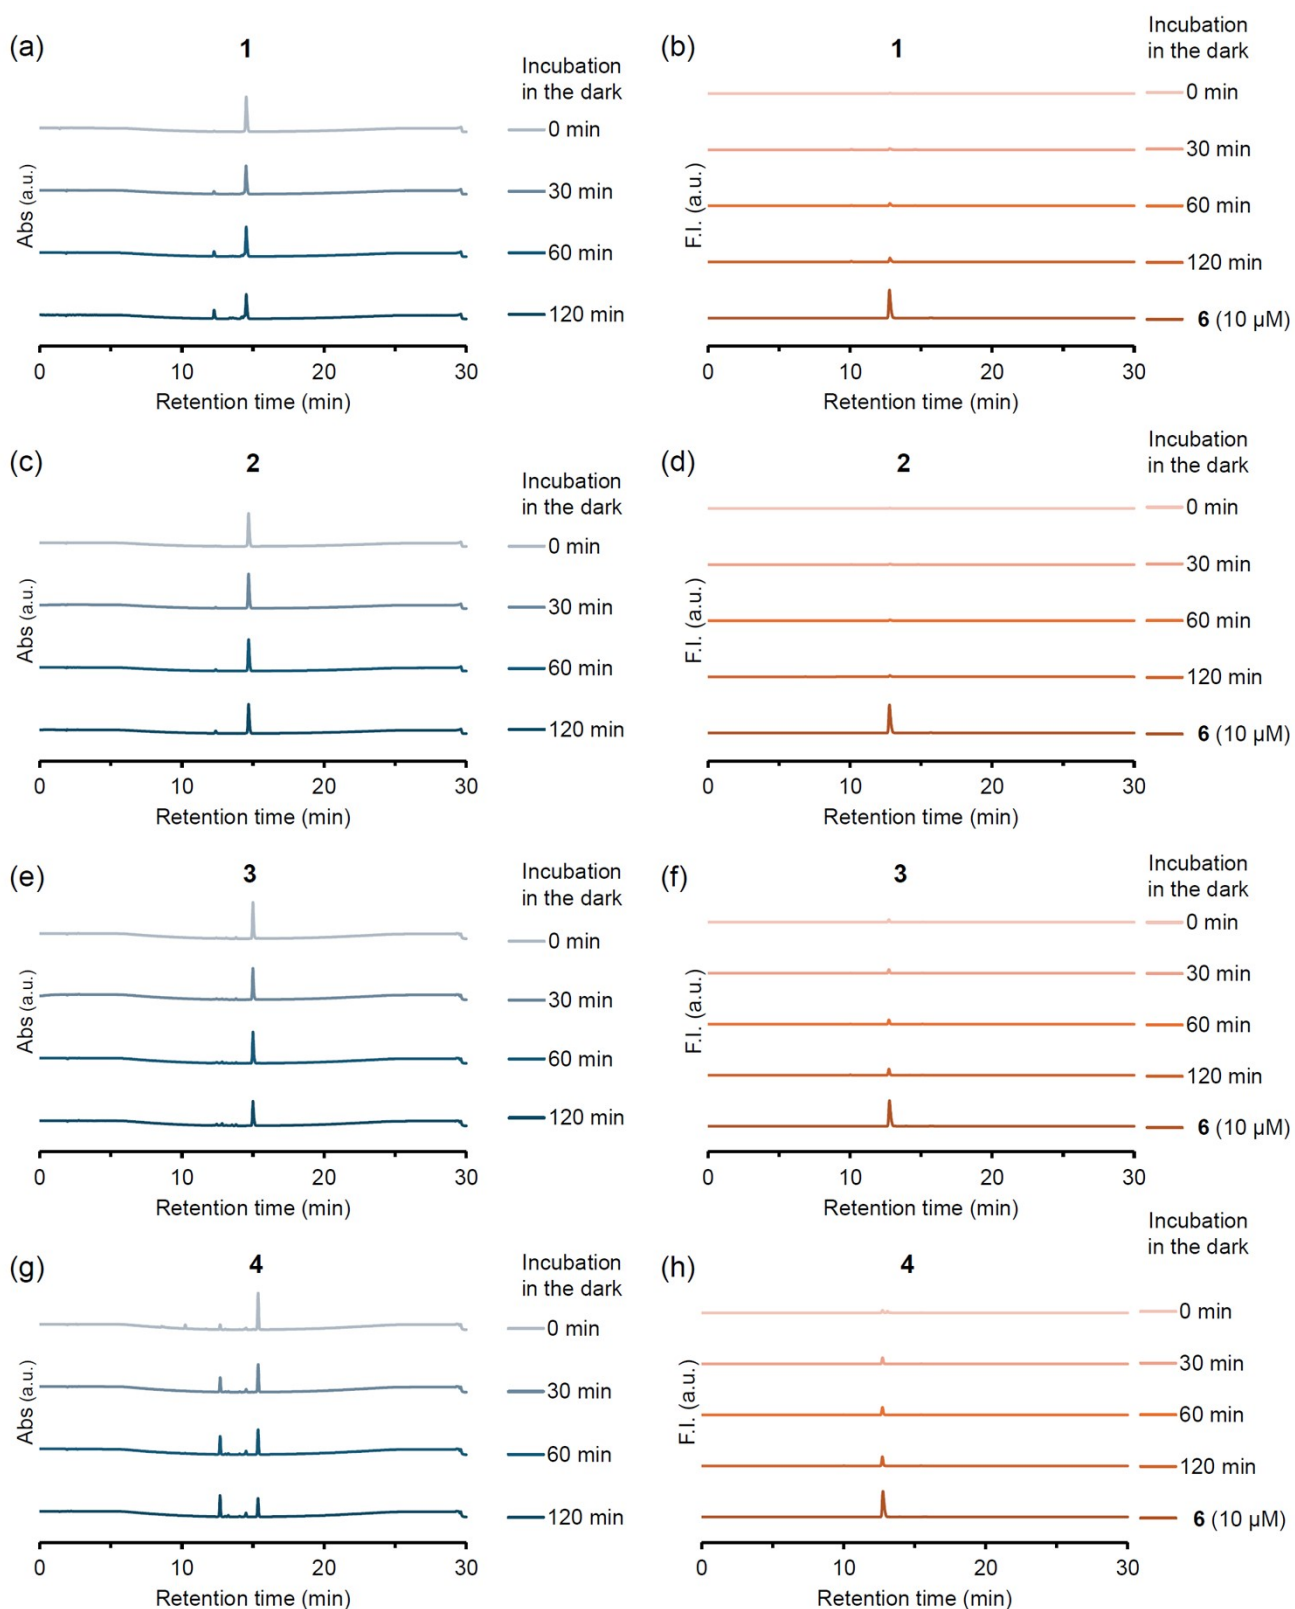

1  
 2 Fig. S3 Chromatograms of each compound (a, c, e, g) and **6** (b, d, f, h) after incubation in the dark for  
 3 the indicated time. Samples were analyzed by HPLC after incubation in dark at 37 °C in 100 mM  
 4 HEPES buffer (pH 7.3, DMSO 0.1%).

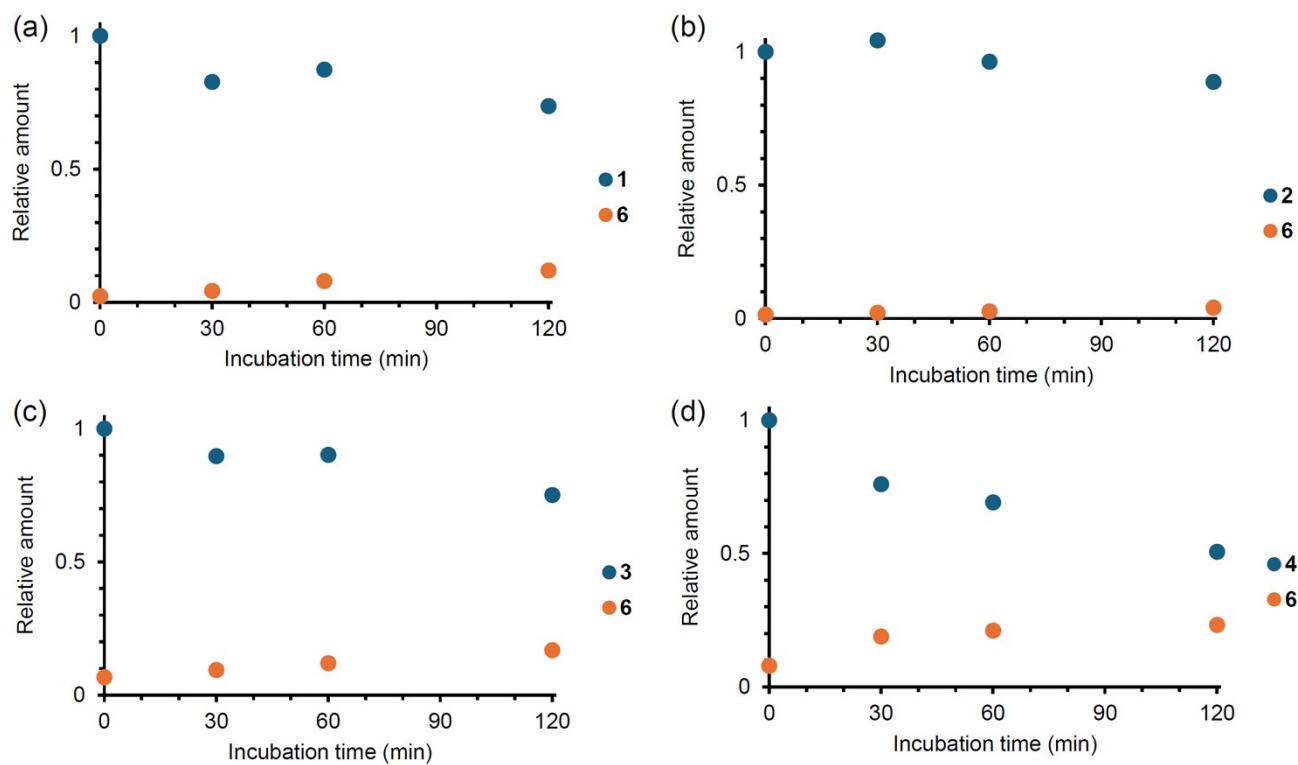

1  
 2 Fig. S4 Relative amount of the remaining amounts of compounds 1–4 and generation of 6 after  
 3 incubation in the dark. Samples were analyzed by HPLC after incubation in dark for the indicated time  
 4 at 37 °C in 100 mM HEPES buffer (pH 7.3, DMSO 0.1%).

1 Table S1 Calculation of  $\Phi_u$  of **1**

| Actinometer<br>(Reinecke's salt reaction)                       | 1st       | 2nd       | 3rd       | average   |     |
|-----------------------------------------------------------------|-----------|-----------|-----------|-----------|-----|
| A450 (before irradi.)                                           | 1.068E+00 | 1.055E+00 | 1.091E+00 |           | (a) |
| [SCN <sup>-</sup> ] (mol L <sup>-1</sup> )                      | 2.484E-04 | 2.454E-04 | 2.538E-04 |           | (b) |
| amount of SCN <sup>-</sup> (mol)                                | 1.246E-05 | 1.231E-05 | 1.273E-05 |           | (c) |
|                                                                 |           |           |           |           |     |
| A'450 (after irradi.)                                           | 1.121E+00 | 1.117E+00 | 1.139E+00 |           | (d) |
| [SCN <sup>-</sup> ] (mol L <sup>-1</sup> )                      | 2.607E-04 | 2.597E-04 | 2.649E-04 |           | (e) |
| amount of SCN <sup>-</sup> (mol)                                | 1.307E-05 | 1.303E-05 | 1.328E-05 |           | (f) |
|                                                                 |           |           |           |           |     |
| $\Delta$ SCN <sup>-</sup> (mol)                                 | 6.149E-07 | 7.172E-07 | 5.550E-07 |           | (g) |
| photons absorbed by RS (mol)                                    | 2.196E-06 | 2.561E-06 | 1.982E-06 |           | (h) |
|                                                                 |           |           |           |           |     |
| Absorbance @600nm of RS                                         | 4.443E-01 |           |           |           | (i) |
| 1-10 <sup>-A</sup>                                              | 6.405E-01 |           |           |           | (j) |
| photons irradiated to the cell (mol)                            | 3.428E-06 | 3.999E-06 | 3.095E-06 | 3.507E-06 | (k) |
|                                                                 |           |           |           |           |     |
| Absorbance @600nm of <b>1</b>                                   | 2.829E-01 |           |           |           | (l) |
| 1-10 <sup>-A</sup>                                              | 4.787E-01 |           |           |           | (m) |
| photons absorbed by <b>1</b> (mol)                              | 1.679E-06 |           |           |           | (n) |
| photons absorbed by <b>1</b> ( $\mu$ mol)                       | 1.679E+00 |           |           |           | (o) |
|                                                                 |           |           |           |           |     |
| Uncaging reaction to release <b>6</b>                           |           |           |           |           |     |
| Release of <b>6</b> from <b>1</b> ( $\mu$ mol L <sup>-1</sup> ) | 5.707E-01 | 5.972E-01 | 3.986E-01 |           | (p) |
| Release of <b>6</b> from <b>1</b> ( $\mu$ mol)                  | 1.712E-03 | 1.762E-03 | 1.176E-03 |           | (q) |
| $\Phi_u$                                                        | 1.020E-03 | 1.049E-03 | 7.004E-04 | 9.231E-04 | (r) |
|                                                                 |           |           |           |           |     |
| $\epsilon_{\max}$ (598nm)                                       | 28424     |           |           |           | (s) |
| $\Phi\epsilon_{\max}$                                           | 26.24     |           |           |           | (t) |

- 2 (a) Absorbance of Reinecke's salt solution at 450 nm before irradiation.
- 3 (b) Concentration of released SCN<sup>-</sup> (mol L<sup>-1</sup>) before irradiation: Calculated by dividing (a) by 4300,
- 4 where 4300 is the molar extinction coefficient of [Fe(SCN)]<sup>2+</sup>.
- 5 (c) Amount of SCN<sup>-</sup> (mol) before irradiation: Calculated by multiplying (b) by the volume (0.00295
- 6 L) and the dilution factor (17).
- 7 (d) Absorbance of Reinecke's salt solution at 450 nm after irradiation.
- 8 (e) Concentration of released SCN<sup>-</sup> (mol L<sup>-1</sup>) after irradiation: Calculated by dividing (d) by 4300.
- 9 (f) Amount of SCN<sup>-</sup> (mol) after irradiation: Calculated by multiplying (e) by the volume (0.00295 L)
- 10 and the dilution factor (17).
- 11 (g) Change in SCN<sup>-</sup> amount (delta SCN<sup>-</sup> in mol): Calculated as (f) – (c), representing SCN<sup>-</sup> generated
- 12 by irradiation.
- 13 (h) Photons absorbed by Reinecke's salt (mol): Calculated by dividing (g) by 0.28 (the quantum yield
- 14 of SCN<sup>-</sup> release at 600 nm).
- 15 (i) Absorbance of the Reinecke's salt (RS) solution at 600 nm.

- 1 (j) Ratio of light absorbed by Reinecke's salt at 600 nm: Calculated as  $1-10^{-(i)}$ .
- 2 (k) Total photons irradiated to the cell (mol): Calculated by dividing (h) by (j).
- 3 (l) Absorbance of Compound **1** at 600 nm.
- 4 (m) Ratio of light absorbed by Compound **1** at 600 nm: Calculated as  $1-10^{-(l)}$ .
- 5 (n) Photons absorbed by **1** (mol): Calculated by multiplying (m) by the average value of (k).
- 6 (o) Photons absorbed by **1** ( $\mu\text{mol}$ ): (n) converted from mol to micromoles.
- 7 (p) Concentration of **6** released from **1** ( $\mu\text{mol L}^{-1}$ ).
- 8 (q) Amount of **6** released from **1** ( $\mu\text{mol}$ ): Calculated by multiplying (p) by the sample volume (0.003
- 9 L).
- 10 (r) Quantum yield ( $\Phi_v$ ): Calculated by dividing (q) by (o).

1 Table S2 Calculation of  $\Phi_u$  of **2**

| Actinometer<br>(Reinecke's salt reaction)        | 1st       | 2nd       | 3rd       | average   |
|--------------------------------------------------|-----------|-----------|-----------|-----------|
| A450 (before irradi.)                            | 1.001E+00 | 1.049E+00 | 1.067E+00 |           |
| [SCN <sup>-</sup> ] (M)                          | 2.327E-04 | 2.438E-04 | 2.481E-04 |           |
| amount of SCN <sup>-</sup> (mol)                 | 1.167E-05 | 1.223E-05 | 1.244E-05 |           |
|                                                  |           |           |           |           |
| A'450 (after irradi.)                            | 1.036E+00 | 1.072E+00 | 1.089E+00 |           |
| [SCN <sup>-</sup> ] (M)                          | 2.408E-04 | 2.493E-04 | 2.533E-04 |           |
| amount of SCN <sup>-</sup> (mol)                 | 1.208E-05 | 1.250E-05 | 1.270E-05 |           |
|                                                  |           |           |           |           |
| $\Delta$ SCN <sup>-</sup> (mol)                  | 4.090E-07 | 2.731E-07 | 2.593E-07 |           |
| photons absorbed by RS (mol)                     | 1.461E-06 | 9.755E-07 | 9.260E-07 |           |
|                                                  |           |           |           |           |
| Absorbance @600nm of RS                          | 4.443E-01 |           |           |           |
| 1-10 <sup>-A</sup>                               | 6.405E-01 |           |           |           |
| photons irradiated to the cell (mol)             | 2.281E-06 | 1.523E-06 | 1.446E-06 | 1.750E-06 |
|                                                  |           |           |           |           |
| Absorbance @600nm of <b>2</b>                    | 3.696E-01 |           |           |           |
| 1-10 <sup>-A</sup>                               | 5.731E-01 |           |           |           |
| photons absorbed by <b>2</b> (mol)               | 1.003E-06 |           |           |           |
| photons absorbed by <b>2</b> ( $\mu$ mol)        | 1.003E+00 |           |           |           |
|                                                  |           |           |           |           |
| Uncaging reaction to release <b>6</b>            |           |           |           |           |
| Release of <b>6</b> from <b>2</b> ( $\mu$ mol/L) | 1.439E+00 | 1.353E+00 | 9.325E-01 |           |
| Release of <b>6</b> from <b>2</b> ( $\mu$ mol)   | 4.317E-03 | 3.991E-03 | 2.751E-03 |           |
| $\Phi_u$                                         | 4.305E-03 | 3.980E-03 | 2.743E-03 | 3.676E-03 |
|                                                  |           |           |           |           |
| $\epsilon_{\max}$ (598nm)                        | 37102     |           |           |           |
| $\Phi\epsilon_{\max}$                            | 136.4     |           |           |           |

2

3

1 Table S3 Calculation of  $\Phi_u$  of **3**

| Actinometer<br>(Reinecke's salt reaction)        | 1st       | 2nd       | 3rd       | average   |
|--------------------------------------------------|-----------|-----------|-----------|-----------|
| A450 (before irradiation)                        | 1.012E+00 | 1.027E+00 | 1.028E+00 |           |
| [SCN <sup>-</sup> ] (M)                          | 2.353E-04 | 2.388E-04 | 2.390E-04 |           |
| amount of SCN <sup>-</sup> (mol)                 | 1.180E-05 | 1.198E-05 | 1.199E-05 |           |
|                                                  |           |           |           |           |
| A'450 (after irradiation)                        | 1.014E+00 | 1.053E+00 | 1.033E+00 |           |
| [SCN <sup>-</sup> ] (M)                          | 2.359E-04 | 2.449E-04 | 2.403E-04 |           |
| amount of SCN <sup>-</sup> (mol)                 | 1.183E-05 | 1.228E-05 | 1.205E-05 |           |
|                                                  |           |           |           |           |
| $\Delta$ SCN <sup>-</sup> (mol)                  | 3.074E-08 | 3.071E-07 | 6.700E-08 |           |
| photons absorbed by RS (mol)                     | 1.098E-07 | 1.097E-06 | 2.393E-07 |           |
|                                                  |           |           |           |           |
| Absorbance @600nm of RS                          | 5.698E-01 |           |           |           |
| $1 \cdot 10^{-A}$                                | 7.307E-01 |           |           |           |
| photons irradiated to the cell (mol)             | 1.502E-07 | 1.501E-06 | 3.275E-07 | 6.595E-07 |
|                                                  |           |           |           |           |
| Absorbance @600nm of <b>3</b>                    | 2.700E-01 |           |           |           |
| $1 \cdot 10^{-A}$                                | 4.629E-01 |           |           |           |
| photons absorbed by <b>3</b> (mol)               | 6.106E-08 |           |           |           |
| photons absorbed by <b>3</b> ( $\mu$ mol)        | 6.106E-02 |           |           |           |
|                                                  |           |           |           |           |
| Uncaging reaction to release <b>6</b>            |           |           |           |           |
| Release of <b>6</b> from <b>3</b> ( $\mu$ mol/L) | 1.111E+00 | 1.423E+00 | 1.563E+00 |           |
| Release of <b>6</b> from <b>3</b> ( $\mu$ mol)   | 3.334E-03 | 4.268E-03 | 4.690E-03 |           |
| $\Phi_u$                                         | 5.461E-02 | 6.990E-02 | 7.681E-02 | 6.710E-02 |
|                                                  |           |           |           |           |
| $\epsilon_{\max}$ (598nm)                        | 27199     |           |           |           |
| $\Phi\epsilon_{\max}$                            | 1825      |           |           |           |

2

3

1

## 2 Cartesian Coordinates

### 3 S<sub>2RT</sub>

4 Sum of electronic and thermal free energies

5 = -594.3276247 A.U

6 -----

|    |   |             |             |             |
|----|---|-------------|-------------|-------------|
| 7  | C | -4.54077614 | 0.41696734  | 0.36649271  |
| 8  | H | -4.78644158 | 0.91280725  | 1.31467591  |
| 9  | H | -5.00591772 | -0.57803254 | 0.36698606  |
| 10 | C | -2.25908028 | 1.26432004  | 0.75532196  |
| 11 | C | -2.55907654 | -0.68167148 | -0.60054474 |
| 12 | C | -0.92581995 | 1.27155069  | 0.47979960  |
| 13 | H | -2.73200462 | 2.00506290  | 1.39943040  |
| 14 | C | -1.22372304 | -0.69859601 | -0.88635685 |
| 15 | H | -3.25943676 | -1.41776396 | -0.99260345 |
| 16 | C | -0.33641925 | 0.28309533  | -0.36959097 |
| 17 | H | -0.31498188 | 2.05045453  | 0.93915735  |
| 18 | H | -0.84900824 | -1.49298168 | -1.53609383 |
| 19 | N | -3.10373169 | 0.28381788  | 0.24556037  |
| 20 | C | 1.12723059  | 0.25545709  | -0.66681635 |
| 21 | H | 1.31440324  | -0.54858297 | -1.39132267 |
| 22 | C | 1.69370756  | 1.56676703  | -1.19584394 |
| 23 | H | 1.19372184  | 1.83414015  | -2.13791659 |
| 24 | O | 1.82992026  | -0.06099543 | 0.58371271  |
| 25 | C | 2.93218803  | -0.82142448 | 0.62892492  |
| 26 | O | 3.47589307  | -0.97315196 | 1.70168664  |
| 27 | H | -4.97034775 | 1.00644868  | -0.46213089 |
| 28 | C | 3.43160126  | -1.47430310 | -0.63656571 |
| 29 | H | 4.36676537  | -1.99463587 | -0.40518572 |
| 30 | H | 2.69707529  | -2.20401716 | -1.00846848 |
| 31 | H | 3.60937944  | -0.73939372 | -1.43383806 |
| 32 | H | 1.53537585  | 2.38150249  | -0.47404826 |
| 33 | H | 2.77420998  | 1.48539816  | -1.38743735 |

34 -----

### 35 S<sub>2TS</sub>

36 Sum of electronic and thermal free energies

37 = -594.3117767 A.U

38 -----

|    |   |             |             |             |
|----|---|-------------|-------------|-------------|
| 39 | C | -4.87830761 | -0.28428268 | 0.43701668  |
| 40 | H | -5.13151949 | 0.50650160  | 1.15091352  |
| 41 | H | -5.07336352 | -1.25936628 | 0.89992686  |
| 42 | C | -2.75985479 | 0.96237267  | 0.32903075  |
| 43 | C | -2.84285177 | -1.23019650 | -0.53943961 |
| 44 | C | -1.45080515 | 1.09162625  | -0.03326606 |
| 45 | H | -3.30719698 | 1.76047258  | 0.82806521  |
| 46 | C | -1.53903095 | -1.15747071 | -0.92474190 |
| 47 | H | -3.45637558 | -2.11473204 | -0.70414298 |
| 48 | C | -0.76396734 | 0.02466501  | -0.69589206 |
| 49 | H | -0.94789346 | 2.03077760  | 0.19198273  |
| 50 | H | -1.08842929 | -2.02286431 | -1.41130337 |
| 51 | N | -3.46351885 | -0.18293136 | 0.08892512  |
| 52 | C | 0.59465563  | 0.07751593  | -1.05479083 |
| 53 | H | 0.93888598  | -0.71590669 | -1.71834116 |
| 54 | C | 1.39642611  | 1.33675097  | -1.03150970 |
| 55 | H | 1.05088741  | 2.02326408  | -1.82377665 |
| 56 | O | 1.49526689  | -0.77447523 | 0.64026542  |
| 57 | C | 2.41732150  | -1.66815630 | 0.59610128  |
| 58 | O | 2.91641249  | -2.17663137 | 1.60928515  |
| 59 | H | -5.49991609 | -0.17526633 | -0.46256363 |
| 60 | C | 2.90623132  | -2.12137130 | -0.77865941 |
| 61 | H | 3.75496538  | -2.80841455 | -0.67085914 |
| 62 | H | 2.09736827  | -2.64140294 | -1.31656524 |
| 63 | H | 3.21109710  | -1.26176200 | -1.39535681 |
| 64 | H | 1.30516295  | 1.85627926  | -0.06757811 |
| 65 | H | 2.45846663  | 1.12376308  | -1.20576664 |

66 -----

### 67 S<sub>2IM</sub>

68 Sum of electronic and thermal free energies

69 = -594.3149685 A.U

70 -----

|    |   |             |            |            |
|----|---|-------------|------------|------------|
| 71 | C | -4.43904456 | 0.13421756 | 0.61092058 |
| 72 | H | -4.80936600 | 1.07957649 | 1.01894813 |

|    |                                             |             |             |             |    |                                             |             |             |             |
|----|---------------------------------------------|-------------|-------------|-------------|----|---------------------------------------------|-------------|-------------|-------------|
| 1  | H                                           | -4.47561630 | -0.63941906 | 1.38885384  | 39 | H                                           | -3.60261473 | -1.82475323 | -0.93896363 |
| 2  | C                                           | -2.37447120 | 1.45707045  | 0.43581896  | 40 | C                                           | -0.71148149 | -0.07353821 | -0.30929575 |
| 3  | C                                           | -2.44277212 | -0.68941150 | -0.52932917 | 41 | H                                           | -0.73447334 | 1.76800621  | 0.87710086  |
| 4  | C                                           | -1.07636797 | 1.62969206  | 0.04162152  | 42 | H                                           | -1.17639841 | -1.91243354 | -1.40246596 |
| 5  | H                                           | -2.92125905 | 2.21991569  | 0.98748539  | 43 | N                                           | -3.49370847 | -0.06600481 | 0.21821155  |
| 6  | C                                           | -1.15052459 | -0.57488124 | -0.94972363 | 44 | C                                           | 0.76916580  | -0.13480365 | -0.51545443 |
| 7  | H                                           | -3.04516366 | -1.57763407 | -0.71381363 | 45 | H                                           | 0.96487409  | -0.83058841 | -1.34586092 |
| 8  | C                                           | -0.39362385 | 0.60689353  | -0.68253824 | 46 | C                                           | 1.37161880  | 1.20603643  | -0.84785361 |
| 9  | H                                           | -0.58459911 | 2.56840519  | 0.29064046  | 47 | C                                           | 2.19051611  | 1.91513680  | -0.06866826 |
| 10 | H                                           | -0.69893159 | -1.40599198 | -1.49102294 | 48 | H                                           | 1.05771739  | 1.60556782  | -1.81898998 |
| 11 | N                                           | -3.05907471 | 0.31577473  | 0.15818861  | 49 | O                                           | 1.36759769  | -0.68361676 | 0.69956778  |
| 12 | C                                           | 0.94586415  | 0.70960975  | -1.08644007 | 50 | C                                           | 2.53058920  | -1.35911729 | 0.68347206  |
| 13 | H                                           | 1.32219670  | -0.08284440 | -1.73278734 | 51 | O                                           | 2.97572335  | -1.74224897 | 1.74272997  |
| 14 | C                                           | 1.77643079  | 1.93364759  | -0.92311213 | 52 | H                                           | -5.35233575 | 0.60865074  | -0.55414444 |
| 15 | H                                           | 1.45553424  | 2.71695243  | -1.63285442 | 53 | C                                           | 2.75170404  | 3.25925013  | -0.42057241 |
| 16 | O                                           | 1.89892880  | -0.34959311 | 0.77877115  | 54 | H                                           | 3.85345016  | 3.23393539  | -0.42732690 |
| 17 | C                                           | 2.79929854  | -1.24700760 | 0.72006144  | 55 | H                                           | 2.40644757  | 3.59959946  | -1.40775758 |
| 18 | O                                           | 3.30454422  | -1.81129756 | 1.70856042  | 56 | H                                           | 2.45889981  | 4.01283037  | 0.32833790  |
| 19 | H                                           | -5.06655946 | -0.16484455 | -0.23733116 | 57 | C                                           | 3.20738091  | -1.62347557 | -0.63723247 |
| 20 | C                                           | 3.27978187  | -1.65765639 | -0.67833142 | 58 | H                                           | 4.17567024  | -2.09434776 | -0.43840025 |
| 21 | H                                           | 4.10762666  | -2.37671521 | -0.61522611 | 59 | H                                           | 2.59823563  | -2.30349741 | -1.25122235 |
| 22 | H                                           | 2.45140875  | -2.11970514 | -1.24006354 | 60 | H                                           | 3.35281758  | -0.69280291 | -1.20273819 |
| 23 | H                                           | 3.60818195  | -0.77614955 | -1.25172217 | 61 | H                                           | 2.48348825  | 1.50277875  | 0.90297885  |
| 24 | H                                           | 1.69364957  | 2.34502566  | 0.09277731  | 62 | -----                                       |             |             |             |
| 25 | H                                           | 2.83294684  | 1.71270169  | -1.11832593 | 63 | <b>S3<sub>TS</sub></b>                      |             |             |             |
| 26 | -----                                       |             |             |             | 64 | Sum of electronic and thermal free energies |             |             |             |
| 27 | <b>S3<sub>RT</sub></b>                      |             |             |             | 65 | = -671.6596042 A.U                          |             |             |             |
| 28 | Sum of electronic and thermal free energies |             |             |             | 66 | -----                                       |             |             |             |
| 29 | = -671.673631 A.U                           |             |             |             | 67 | C                                           | -4.93155513 | -0.12945055 | 0.47795135  |
| 30 | -----                                       |             |             |             | 68 | H                                           | -5.11990676 | 0.61851976  | 1.25618745  |
| 31 | C                                           | -4.93484262 | 0.05303858  | 0.30334857  | 69 | H                                           | -5.20858677 | -1.11806351 | 0.86293729  |
| 32 | H                                           | -5.20711496 | 0.57792675  | 1.22837943  | 70 | C                                           | -2.76228451 | 1.01320095  | 0.29094016  |
| 33 | H                                           | -5.38747862 | -0.94717868 | 0.32807535  | 71 | C                                           | -2.93662573 | -1.22691154 | -0.43601579 |
| 34 | C                                           | -2.67392625 | 0.95254001  | 0.69580402  | 72 | C                                           | -1.45016539 | 1.06410539  | -0.07559425 |
| 35 | C                                           | -2.91816764 | -1.06638745 | -0.56116556 | 73 | H                                           | -3.27796075 | 1.86682525  | 0.72832778  |
| 36 | C                                           | -1.33190096 | 0.95446196  | 0.46213555  | 74 | C                                           | -1.63283748 | -1.22804855 | -0.82641838 |
| 37 | H                                           | -3.17416046 | 1.72766800  | 1.27524277  | 75 | H                                           | -3.58318756 | -2.09641445 | -0.54676253 |
| 38 | C                                           | -1.57643592 | -1.08933175 | -0.80607295 | 76 | C                                           | -0.80532335 | -0.06897275 | -0.66357609 |

|    |                                             |             |             |             |    |                                             |             |             |             |
|----|---------------------------------------------|-------------|-------------|-------------|----|---------------------------------------------|-------------|-------------|-------------|
| 1  | H                                           | -0.90888224 | 1.99669775  | 0.07382036  | 39 | N                                           | -3.30453020 | 0.05450951  | 0.35269354  |
| 2  | H                                           | -1.21874836 | -2.13905186 | -1.25909005 | 40 | C                                           | 0.70489867  | 0.51720110  | -0.90400345 |
| 3  | N                                           | -3.51422275 | -0.12126009 | 0.13365261  | 41 | H                                           | 1.11230132  | -0.42994016 | -1.27953492 |
| 4  | C                                           | 0.56697041  | -0.12198235 | -1.02175674 | 42 | C                                           | 1.57365524  | 1.63431157  | -0.88325557 |
| 5  | H                                           | 0.81253876  | -0.90801662 | -1.73893385 | 43 | C                                           | 1.44712316  | 2.80512142  | -0.18281132 |
| 6  | C                                           | 1.41347708  | 1.07936156  | -1.11511537 | 44 | H                                           | 2.50025899  | 1.50242990  | -1.45367152 |
| 7  | C                                           | 1.73328869  | 1.88469011  | -0.09397766 | 45 | O                                           | 1.14501932  | -2.56812600 | -1.15823047 |
| 8  | H                                           | 1.82099632  | 1.28987409  | -2.11160149 | 46 | C                                           | 1.99493893  | -2.91240740 | -0.28009102 |
| 9  | O                                           | 1.28627965  | -1.10531622 | 0.52718364  | 47 | O                                           | 1.76731080  | -3.58517091 | 0.74572398  |
| 10 | C                                           | 2.41507314  | -1.73740937 | 0.49322967  | 48 | H                                           | -5.20961252 | -0.79051999 | 0.07989295  |
| 11 | O                                           | 2.87871750  | -2.30341057 | 1.48710833  | 49 | C                                           | 2.44832194  | 3.90837538  | -0.22183709 |
| 12 | H                                           | -5.54520439 | 0.10226001  | -0.40464597 | 50 | H                                           | 2.84418637  | 4.10701798  | 0.78788029  |
| 13 | C                                           | 2.58662231  | 3.10794815  | -0.20521705 | 51 | H                                           | 3.28784321  | 3.68026000  | -0.89329009 |
| 14 | H                                           | 3.47977990  | 3.02115319  | 0.43469542  | 52 | H                                           | 1.97361460  | 4.84580953  | -0.55666633 |
| 15 | H                                           | 2.91463094  | 3.28339050  | -1.24015397 | 53 | C                                           | 3.42704926  | -2.40115868 | -0.51299259 |
| 16 | H                                           | 2.03778106  | 3.99849393  | 0.14203376  | 54 | H                                           | 4.15741812  | -2.92356639 | 0.12119457  |
| 17 | C                                           | 3.17425173  | -1.78210508 | -0.82594336 | 55 | H                                           | 3.71110786  | -2.49930249 | -1.57163090 |
| 18 | H                                           | 4.13275612  | -2.29696091 | -0.68722349 | 56 | H                                           | 3.46295137  | -1.32541618 | -0.26867339 |
| 19 | H                                           | 2.58759692  | -2.31941991 | -1.58751795 | 57 | H                                           | 0.59861206  | 2.95048961  | 0.49138250  |
| 20 | H                                           | 3.35320247  | -0.76528979 | -1.20605458 | 58 | -----                                       |             |             |             |
| 21 | H                                           | 1.37358179  | 1.62087791  | 0.90652348  | 59 | <b>S4<sub>RT</sub></b>                      |             |             |             |
| 22 | -----                                       |             |             |             | 60 | Sum of electronic and thermal free energies |             |             |             |
| 23 | <b>S3<sub>IM</sub></b>                      |             |             |             | 61 | = -671.6713090 A.U                          |             |             |             |
| 24 | Sum of electronic and thermal free energies |             |             |             | 62 | -----                                       |             |             |             |
| 25 | = -671.6786812 A.U                          |             |             |             | 63 | C                                           | -4.90778571 | 0.13359987  | 0.15380309  |
| 26 | -----                                       |             |             |             | 64 | H                                           | -5.18518999 | 0.72234320  | 1.03812011  |
| 27 | C                                           | -4.68352487 | -0.16083225 | 0.80684733  | 65 | H                                           | -5.34122976 | -0.86985113 | 0.25713470  |
| 28 | H                                           | -5.18845514 | 0.80588458  | 0.88901287  | 66 | C                                           | -2.66447092 | 1.11461359  | 0.42868740  |
| 29 | H                                           | -4.66893878 | -0.65374002 | 1.78633664  | 67 | C                                           | -2.87232148 | -1.02799941 | -0.60645730 |
| 30 | C                                           | -2.82033649 | 1.30253651  | 0.17153463  | 68 | C                                           | -1.32219498 | 1.11797333  | 0.19037592  |
| 31 | C                                           | -2.51291767 | -1.02152412 | 0.10555239  | 69 | H                                           | -3.17862275 | 1.93938617  | 0.92047467  |
| 32 | C                                           | -1.52452822 | 1.51763651  | -0.23365776 | 70 | C                                           | -1.53272580 | -1.05071576 | -0.85470034 |
| 33 | H                                           | -3.51254451 | 2.12162373  | 0.35754413  | 71 | H                                           | -3.54263981 | -1.83430975 | -0.90162403 |
| 34 | C                                           | -1.21568107 | -0.87518054 | -0.30876458 | 72 | C                                           | -0.68192969 | 0.02767262  | -0.46725657 |
| 35 | H                                           | -2.97505772 | -1.99562221 | 0.25865103  | 73 | H                                           | -0.74698249 | 1.98863676  | 0.50797507  |
| 36 | C                                           | -0.65688833 | 0.42295841  | -0.47021220 | 74 | H                                           | -1.11863170 | -1.92314829 | -1.36489327 |
| 37 | H                                           | -1.21178935 | 2.54490980  | -0.40376117 | 75 | N                                           | -3.46495687 | 0.03418724  | 0.06833850  |
| 38 | H                                           | -0.58535834 | -1.75218817 | -0.51471049 | 76 | C                                           | 0.79619336  | -0.05675032 | -0.67577986 |

|    |                                             |             |             |             |    |                                             |             |             |             |
|----|---------------------------------------------|-------------|-------------|-------------|----|---------------------------------------------|-------------|-------------|-------------|
| 1  | H                                           | 0.97553825  | -0.71986579 | -1.53576651 | 39 | C                                           | 1.73477836  | 1.90278533  | 0.00900251  |
| 2  | C                                           | 1.45238621  | 1.27220490  | -0.96384782 | 40 | C                                           | 1.36726981  | 1.75963310  | 1.45334317  |
| 3  | C                                           | 1.98077533  | 2.15251879  | -0.10550855 | 41 | H                                           | 0.83991646  | 0.81853236  | 1.64894888  |
| 4  | C                                           | 2.06313629  | 2.07110293  | 1.39081915  | 42 | H                                           | 2.27773035  | 1.78351444  | 2.07435732  |
| 5  | H                                           | 1.50089036  | 1.22452325  | 1.80051380  | 43 | H                                           | 0.74385377  | 2.60823229  | 1.78240666  |
| 6  | H                                           | 3.11350986  | 1.97721018  | 1.71417995  | 44 | H                                           | 1.81981208  | 1.29596495  | -1.99047936 |
| 7  | H                                           | 1.68105153  | 3.00360481  | 1.83612619  | 45 | O                                           | 1.25915625  | -1.22404832 | 0.50910903  |
| 8  | H                                           | 1.46192636  | 1.52640338  | -2.02854329 | 46 | C                                           | 2.40424427  | -1.83011210 | 0.45329743  |
| 9  | O                                           | 1.37270131  | -0.71569098 | 0.50460098  | 47 | O                                           | 2.85519013  | -2.45900772 | 1.41303214  |
| 10 | C                                           | 2.57937844  | -1.30651213 | 0.47165363  | 48 | H                                           | -5.54436302 | 0.32020294  | -0.38158367 |
| 11 | O                                           | 3.02542675  | -1.74071121 | 1.51122659  | 49 | C                                           | 3.19081599  | -1.76044748 | -0.84765971 |
| 12 | H                                           | -5.33934350 | 0.61486129  | -0.74076476 | 50 | H                                           | 4.14735485  | -2.28412374 | -0.73165330 |
| 13 | C                                           | 3.30154728  | -1.42377630 | -0.84586975 | 51 | H                                           | 2.62302616  | -2.22996842 | -1.66596433 |
| 14 | H                                           | 4.27211585  | -1.89785818 | -0.66692581 | 52 | H                                           | 3.37592360  | -0.71461408 | -1.13358237 |
| 15 | H                                           | 2.72241453  | -2.03942067 | -1.54989374 | 53 | H                                           | 2.36674945  | 2.76226490  | -0.24074661 |
| 16 | H                                           | 3.44764979  | -0.43565317 | -1.30370520 | 54 | -----                                       |             |             |             |
| 17 | H                                           | 2.40845395  | 3.06119075  | -0.54456693 | 55 | <b>S4<sub>IM</sub></b>                      |             |             |             |
| 18 | -----                                       |             |             |             | 56 | Sum of electronic and thermal free energies |             |             |             |
| 19 | <b>S4<sub>TS</sub></b>                      |             |             |             | 57 | = -671.6657107 A.U                          |             |             |             |
| 20 | Sum of electronic and thermal free energies |             |             |             | 58 | -----                                       |             |             |             |
| 21 | = -671.6572309 A.U                          |             |             |             | 59 | C                                           | -4.63113481 | 0.03765554  | 0.62625237  |
| 22 | -----                                       |             |             |             | 60 | H                                           | -4.75702647 | 0.66950115  | 1.51192133  |
| 23 | C                                           | -4.96723904 | -0.13389536 | 0.43690555  | 61 | H                                           | -4.83406737 | -1.00424218 | 0.89268779  |
| 24 | H                                           | -5.13550258 | 0.43548347  | 1.35917081  | 62 | C                                           | -2.62154023 | 1.35109688  | 0.17824669  |
| 25 | H                                           | -5.30712792 | -1.16398523 | 0.59007098  | 63 | C                                           | -2.61732679 | -0.92826517 | -0.38426618 |
| 26 | C                                           | -2.80586659 | 1.00796171  | 0.26089817  | 64 | C                                           | -1.34550530 | 1.50312898  | -0.29747541 |
| 27 | C                                           | -2.94365229 | -1.25427361 | -0.40528689 | 65 | H                                           | -3.19127852 | 2.18001902  | 0.59490455  |
| 28 | C                                           | -1.48592170 | 1.05986016  | -0.07339386 | 66 | C                                           | -1.34519555 | -0.83474350 | -0.87997611 |
| 29 | H                                           | -3.34250190 | 1.86971613  | 0.65526513  | 67 | H                                           | -3.17625637 | -1.86233849 | -0.38000218 |
| 30 | C                                           | -1.63032522 | -1.25402118 | -0.76438662 | 68 | C                                           | -0.64365714 | 0.39885381  | -0.84593452 |
| 31 | H                                           | -3.57864787 | -2.13330095 | -0.50639078 | 69 | H                                           | -0.89464742 | 2.49317953  | -0.27243562 |
| 32 | C                                           | -0.81673964 | -0.08449322 | -0.61004297 | 70 | H                                           | -0.85603391 | -1.72821429 | -1.26074456 |
| 33 | H                                           | -0.95925187 | 2.00418576  | 0.05098607  | 71 | N                                           | -3.24989892 | 0.15034892  | 0.14595800  |
| 34 | H                                           | -1.19753176 | -2.17266584 | -1.16056115 | 72 | C                                           | 0.66548710  | 0.49524290  | -1.38830784 |
| 35 | N                                           | -3.54397504 | -0.13915116 | 0.11898331  | 73 | H                                           | 0.95389763  | -0.29126899 | -2.08771057 |
| 36 | C                                           | 0.56318642  | -0.12897558 | -0.94668299 | 74 | C                                           | 1.58317685  | 1.58582813  | -1.21981144 |
| 37 | H                                           | 0.81345130  | -0.87884210 | -1.69994660 | 75 | C                                           | 1.85465125  | 2.25727867  | -0.07146385 |
| 38 | C                                           | 1.40594339  | 1.07981204  | -0.99944395 | 76 | C                                           | 1.34314348  | 1.92815894  | 1.29511475  |

|    |                                             |             |             |             |    |                                             |             |             |             |
|----|---------------------------------------------|-------------|-------------|-------------|----|---------------------------------------------|-------------|-------------|-------------|
| 1  | H                                           | 0.92591631  | 0.91183904  | 1.32843617  | 39 | H                                           | 1.23960253  | 2.64523270  | 1.98719422  |
| 2  | H                                           | 2.16992286  | 1.99263558  | 2.01974065  | 40 | H                                           | 1.49706917  | 1.32837347  | -1.92661079 |
| 3  | H                                           | 0.57937334  | 2.65048201  | 1.63088861  | 41 | O                                           | 1.21772003  | -1.01125504 | 0.47346245  |
| 4  | H                                           | 2.19164451  | 1.82807096  | -2.09801123 | 42 | C                                           | 2.41313908  | -1.61921806 | 0.40681325  |
| 5  | O                                           | 1.25354102  | -1.42934532 | 0.42913877  | 43 | O                                           | 2.83999226  | -2.14221219 | 1.41355184  |
| 6  | C                                           | 2.41467226  | -1.92894423 | 0.50583760  | 44 | H                                           | -5.48295766 | 0.34591971  | -0.74261387 |
| 7  | O                                           | 2.84282601  | -2.65808497 | 1.42604407  | 45 | C                                           | 2.51381346  | 3.19761276  | -0.36924429 |
| 8  | H                                           | -5.32261486 | 0.36004000  | -0.16291298 | 46 | H                                           | 3.52964963  | 3.24038007  | 0.05805339  |
| 9  | C                                           | 3.37002013  | -1.59118966 | -0.65286859 | 47 | H                                           | 2.59276351  | 3.28637419  | -1.46162815 |
| 10 | H                                           | 4.34865823  | -2.07582878 | -0.52689821 | 48 | H                                           | 1.97399483  | 4.07884820  | 0.01545738  |
| 11 | H                                           | 2.92904795  | -1.90979285 | -1.61144839 | 49 | C                                           | 3.14987251  | -1.64658736 | -0.90769463 |
| 12 | H                                           | 3.50882450  | -0.49983769 | -0.71593842 | 50 | H                                           | 4.10877023  | -2.15308611 | -0.75623513 |
| 13 | H                                           | 2.58558875  | 3.07009612  | -0.13594936 | 51 | H                                           | 2.56775703  | -2.19187077 | -1.66526816 |
| 14 | -----                                       |             |             |             | 52 | H                                           | 3.31972186  | -0.62815675 | -1.28345741 |
| 15 | <b>S5<sub>RT</sub></b>                      |             |             |             | 53 | -----                                       |             |             |             |
| 16 | Sum of electronic and thermal free energies |             |             |             | 54 | <b>S5<sub>TS</sub></b>                      |             |             |             |
| 17 | = -710.9545991 A.U                          |             |             |             | 55 | Sum of electronic and thermal free energies |             |             |             |
| 18 | -----                                       |             |             |             | 56 | = -710.9422563 A.U                          |             |             |             |
| 19 | C                                           | -5.04135239 | -0.05544771 | 0.18589825  | 57 | -----                                       |             |             |             |
| 20 | H                                           | -5.32546901 | 0.59846358  | 1.02118638  | 58 | C                                           | -4.96240599 | -0.13674060 | 0.44080461  |
| 21 | H                                           | -5.45919495 | -1.05351122 | 0.37141853  | 59 | H                                           | -5.13341071 | 0.43793340  | 1.35945986  |
| 22 | C                                           | -2.81630262 | 0.99044239  | 0.33158317  | 60 | H                                           | -5.30002182 | -1.16666363 | 0.60075445  |
| 23 | C                                           | -2.98757638 | -1.25864323 | -0.45313734 | 61 | C                                           | -2.80777921 | 1.01504285  | 0.24613143  |
| 24 | C                                           | -1.47307118 | 0.98918255  | 0.08952991  | 62 | C                                           | -2.93146847 | -1.25960864 | -0.38353418 |
| 25 | H                                           | -3.34479125 | 1.85774688  | 0.72495136  | 63 | C                                           | -1.48787762 | 1.06842647  | -0.08728793 |
| 26 | C                                           | -1.64989705 | -1.28560431 | -0.70387098 | 64 | H                                           | -3.35035046 | 1.88066510  | 0.62368513  |
| 27 | H                                           | -3.64401970 | -2.10441846 | -0.65488928 | 65 | C                                           | -1.61784028 | -1.25720815 | -0.74070547 |
| 28 | C                                           | -0.81463021 | -0.15513281 | -0.43900279 | 66 | H                                           | -3.56107510 | -2.14384570 | -0.47205668 |
| 29 | H                                           | -0.91433827 | 1.90180000  | 0.29990303  | 67 | C                                           | -0.81077380 | -0.08078881 | -0.60303115 |
| 30 | H                                           | -1.22138500 | -2.20141536 | -1.11647222 | 68 | H                                           | -0.96660465 | 2.01793872  | 0.01970259  |
| 31 | N                                           | -3.59765217 | -0.14031454 | 0.10293751  | 69 | H                                           | -1.17862879 | -2.17946439 | -1.12109649 |
| 32 | C                                           | 0.66168766  | -0.25228793 | -0.66185988 | 70 | N                                           | -3.53941257 | -0.13964160 | 0.12349265  |
| 33 | H                                           | 0.82602956  | -0.87029646 | -1.55813386 | 71 | C                                           | 0.57067510  | -0.12132365 | -0.93982504 |
| 34 | C                                           | 1.36532875  | 1.06626020  | -0.87162264 | 72 | H                                           | 0.81902461  | -0.86709761 | -1.69811851 |
| 35 | C                                           | 1.81908508  | 1.92872691  | 0.05049370  | 73 | C                                           | 1.41328835  | 1.08471698  | -0.99420774 |
| 36 | C                                           | 1.69480075  | 1.74589723  | 1.54033658  | 74 | C                                           | 1.74466539  | 1.91999414  | 0.00889783  |
| 37 | H                                           | 1.09859657  | 0.87003541  | 1.81602689  | 75 | C                                           | 1.33434762  | 1.72594836  | 1.44192944  |
| 38 | H                                           | 2.69456832  | 1.64159610  | 1.99506060  | 76 | H                                           | 0.81643963  | 0.77392214  | 1.59997735  |

|    |       |             |             |             |    |   |             |             |             |
|----|-------|-------------|-------------|-------------|----|---|-------------|-------------|-------------|
| 1  | H     | 2.22837848  | 1.74577609  | 2.08742415  | 39 | H | 0.86873373  | 0.70135253  | 1.12886706  |
| 2  | H     | 0.69136316  | 2.55862366  | 1.77474086  | 40 | H | 1.96796273  | 1.93746328  | 1.80379750  |
| 3  | H     | 1.83561724  | 1.28808740  | -1.98500661 | 41 | H | 0.32973094  | 2.40101786  | 1.34076777  |
| 4  | O     | 1.25790695  | -1.24042484 | 0.49618730  | 42 | H | 2.04277963  | 1.56149895  | -2.31522182 |
| 5  | C     | 2.40618212  | -1.84030518 | 0.43981699  | 43 | O | 0.90865990  | -1.81175860 | 1.11251503  |
| 6  | O     | 2.84269279  | -2.50047495 | 1.38519414  | 44 | C | 1.60865512  | -2.13205271 | 0.11983032  |
| 7  | H     | -5.54133930 | 0.31030205  | -0.38048890 | 45 | O | 1.21070732  | -2.74072445 | -0.91259077 |
| 8  | C     | 2.60951042  | 3.12270768  | -0.25221391 | 46 | H | -5.25962129 | -0.88617322 | 0.14126824  |
| 9  | H     | 3.53973698  | 3.06546657  | 0.33738839  | 47 | C | 2.67236260  | 3.23703548  | -0.37265217 |
| 10 | H     | 2.87407198  | 3.22287838  | -1.31395393 | 48 | H | 3.55627649  | 3.02728847  | 0.25279933  |
| 11 | H     | 2.09271669  | 4.04312024  | 0.06714846  | 49 | H | 3.00509833  | 3.44799942  | -1.39782744 |
| 12 | C     | 3.21616556  | -1.72168306 | -0.84293633 | 50 | H | 2.20887379  | 4.14850253  | 0.04108995  |
| 13 | H     | 4.17567383  | -2.23965024 | -0.72522210 | 51 | C | 3.08450307  | -1.69867561 | 0.14190181  |
| 14 | H     | 2.66845593  | -2.17038900 | -1.68631917 | 52 | H | 3.69652498  | -2.29084176 | -0.55352711 |
| 15 | H     | 3.39382796  | -0.66521315 | -1.09202650 | 53 | H | 3.13918460  | -0.64152618 | -0.16997903 |
| 16 | ----- |             |             |             | 54 | H | 3.50071319  | -1.76258110 | 1.15836189  |

17 **S5<sub>IM</sub>**

18 Sum of electronic and thermal free energies

19 = -710.9569458 A.U

20 -----

|    |   |             |             |             |
|----|---|-------------|-------------|-------------|
| 21 | C | -4.62550452 | -0.30141938 | 0.81769124  |
| 22 | H | -5.07786907 | 0.68045628  | 0.98491457  |
| 23 | H | -4.51932647 | -0.82642445 | 1.77523053  |
| 24 | C | -2.76140275 | 1.10738315  | 0.07416178  |
| 25 | C | -2.60971759 | -1.22008017 | -0.20085274 |
| 26 | C | -1.51488372 | 1.28085182  | -0.47520133 |
| 27 | H | -3.37107664 | 1.94339632  | 0.41153046  |
| 28 | C | -1.36537462 | -1.11249533 | -0.76058387 |
| 29 | H | -3.10201942 | -2.17829712 | -0.04144454 |
| 30 | C | -0.76553426 | 0.16429656  | -0.91692166 |
| 31 | H | -1.13401127 | 2.29360634  | -0.59679028 |
| 32 | H | -0.77895505 | -2.00223310 | -1.01051507 |
| 33 | N | -3.30225109 | -0.12441341 | 0.20996861  |
| 34 | C | 0.50341558  | 0.28871695  | -1.56021776 |
| 35 | H | 0.77812872  | -0.53011735 | -2.22931675 |
| 36 | C | 1.41765109  | 1.36832353  | -1.43578862 |
| 37 | C | 1.70150809  | 2.09619749  | -0.30773632 |
| 38 | C | 1.17822705  | 1.75470065  | 1.05809893  |

55 -----

- 
- S1 J. B. Grimm, T. A. Brown, A. N. Tkachuk, and L. D. Lavis, *ACS Cent. Sci.* **2017**, *3*, 975–985
- S2 M. J. Frisch, G. W. Trucks, H. B. Schlegel, G. E. Scuseria, M. A. Robb, J. R. Cheeseman, G. Scalmani, V. Barone, G. A. Petersson, H. Nakatsuji, X. Li, M. Caricato, A. V. Marenich, J. Bloino, B. G. Janesko, R. Gomperts, B. Mennucci, H. P. Hratchian, J. V. Ortiz, A. F. Izmaylov, J. L. Sonnenberg, D. Williams-Young, F. Ding, F. Lipparini, F. Egidi, J. Goings, B. Peng, A. Petrone, T. Henderson, D. Ranasinghe, V. G. Zakrzewski, J. Gao, N. Rega, G. Zheng, W. Liang, M. Hada, M. Ehara, K. Toyota, R. Fukuda, J. Hasegawa, M. Ishida, T. Nakajima, Y. Honda, O. Kitao, H. Nakai, T. Vreven, K. Throssell, J. A. Montgomery Jr., J. E. Peralta, F. Ogliaro, M. J. Bearpark, J. J. Heyd, E. N. Brothers, K. N. Kudin, V. N. Staroverov, T. A. Keith, R. Kobayashi, J. Normand, K. Raghavachari, A. P. Rendell, J. C. Burant, S. S. Iyengar, J. Tomasi, M. Cossi, J. M. Millam, M. Klene, C. Adamo, R. Cammi, J. W. Ochterski, R. L. Martin, K. Morokuma, O. Farkas, J. B. Foresman, and D. J. Fox, *Gaussian 16*, Revision C.01, Gaussian, Inc., Wallingford CT, **2016**.
- S3 (a) K. Fukui, *Acc. Chem. Res.* **1981**, *14*, 363. (b) K. Ishida, K. Morokuma, and A. Komornicki, *J. Chem. Phys.* **1977**, *66*, 2153. (c) C. Gonzalez and H. B. Schlegel, *J. Chem. Phys.* **1989**, *90*, 2154. (d) C. Gonzalez and H. B. Schlegel, *J. Phys. Chem.* **1990**, *94*, 5523.
